# Supplementary material for: Asperopiperazines A and B: Antimicrobial and Cytotoxic Dipeptides from a Tunicate-Derived Fungus Aspergillus sp. DY001
Source: MDPI journal article supplement (doi:10.3390/md20070451), 2022-07-10

|                                                                                                                                           |    |
|-------------------------------------------------------------------------------------------------------------------------------------------|----|
| <b>Figure S1.</b> HRESIMS spectrum of asperopiperazine A ( <b>1</b> )                                                                     | 1  |
| <b>Figure S2.</b> 600 MHz $^1\text{H}$ NMR spectrum of asperopiperazine A ( <b>1</b> ) ( $\text{CD}_3\text{OD}$ )                         | 2  |
| <b>Figure S3.</b> 150 MHz $^{13}\text{C}$ NMR spectrum of asperopiperazine A ( <b>1</b> ) ( $\text{CD}_3\text{OD}$ )                      | 4  |
| <b>Figure S4.</b> DEPT spectrum of asperopiperazine A ( <b>1</b> ) ( $\text{CD}_3\text{OD}$ )                                             | 5  |
| <b>Figure S5.</b> COSY spectrum of asperopiperazine A ( <b>1</b> ) ( $\text{CD}_3\text{OD}$ )                                             | 6  |
| <b>Figure S6.</b> HSQC spectrum of asperopiperazine A ( <b>1</b> ) ( $\text{CD}_3\text{OD}$ )                                             | 7  |
| <b>Figure S7.</b> HMBC spectrum of asperopiperazine A ( <b>1</b> ) ( $\text{CD}_3\text{OD}$ )                                             | 8  |
| <b>Figure S8.</b> HRESIMS spectrum of asperopiperazine B ( <b>2</b> )                                                                     | 9  |
| <b>Figure S9.</b> 850 MHz $^1\text{H}$ NMR spectrum of asperopiperazine B ( <b>2</b> ) ( $\text{CDCl}_3$ )                                | 10 |
| <b>Figure S10.</b> 213 MHz $^{13}\text{C}$ NMR spectrum of asperopiperazine B ( <b>2</b> ) ( $\text{CDCl}_3$ )                            | 12 |
| <b>Figure S11.</b> COSY spectrum of asperopiperazine B ( <b>2</b> ) ( $\text{CDCl}_3$ )                                                   | 13 |
| <b>Figure S12.</b> HSQC spectrum of asperopiperazine B ( <b>2</b> ) ( $\text{CDCl}_3$ )                                                   | 14 |
| <b>Figure S13.</b> HMBC spectrum of asperopiperazine B ( <b>2</b> ) ( $\text{CDCl}_3$ )                                                   | 15 |
| <b>Figure S14.</b> NOESY spectrum of asperopiperazine B ( <b>2</b> ) ( $\text{CDCl}_3$ )                                                  | 16 |
| <b>Figure S15.</b> HRESIMS spectrum of (+)-citreoisocoumarin ( <b>3</b> )                                                                 | 17 |
| <b>Figure S16.</b> 600 MHz $^1\text{H}$ NMR spectrum of (+)-citreoisocoumarin ( <b>3</b> ) ( $\text{CDCl}_3$ )                            | 18 |
| <b>Figure S17.</b> 150 MHz $^1\text{H}$ NMR spectrum of (+)-citreoisocoumarin ( <b>3</b> ) ( $\text{CDCl}_3$ )                            | 20 |
| <b>Figure S18.</b> COSY spectrum of (+)-citreoisocoumarin ( <b>3</b> ) ( $\text{CDCl}_3$ )                                                | 21 |
| <b>Figure S19.</b> HSQC NMR spectrum of (+)-citreoisocoumarin ( <b>3</b> ) ( $\text{CDCl}_3$ )                                            | 22 |
| <b>Figure S20.</b> HMBC NMR spectrum of (+)-citreoisocoumarin ( <b>3</b> ) ( $\text{CDCl}_3$ )                                            | 23 |
| <b>Figure S21.</b> HRESIMS spectrum of (-)-6,8-di- <i>O</i> -methylcitreoisocoumarin ( <b>4</b> )                                         | 24 |
| <b>Figure S22.</b> 600 MHz $^1\text{H}$ NMR spectrum of (-)-6,8-di- <i>O</i> -methylcitreoisocoumarin ( <b>4</b> ) ( $\text{CDCl}_3$ )    | 25 |
| <b>Figure S23.</b> 150 MHz $^{13}\text{C}$ NMR spectrum of (-)-6,8-di- <i>O</i> -methylcitreoisocoumarin ( <b>4</b> ) ( $\text{CDCl}_3$ ) | 27 |
| <b>Figure S24.</b> COSY spectrum of (-)-6,8-di- <i>O</i> -methylcitreoisocoumarin ( <b>4</b> ) ( $\text{CDCl}_3$ )                        | 28 |
| <b>Figure S25.</b> HSQC spectrum of (-)-6,8-di- <i>O</i> -methylcitreoisocoumarin ( <b>4</b> ) ( $\text{CDCl}_3$ )                        | 29 |
| <b>Figure S26.</b> HMBC spectrum of (-)-6,8-di- <i>O</i> -methylcitreoisocoumarin ( <b>4</b> ) ( $\text{CDCl}_3$ )                        | 30 |
| <b>Figure 27.</b> HPLC chromatograms of L-FDLA derivatized standard amino acid and the hydrolysates of compounds <b>1</b> and <b>2</b>    | 31 |

**Figure S1.** HRESIMS spectrum of asperopiperazine A (**1**).

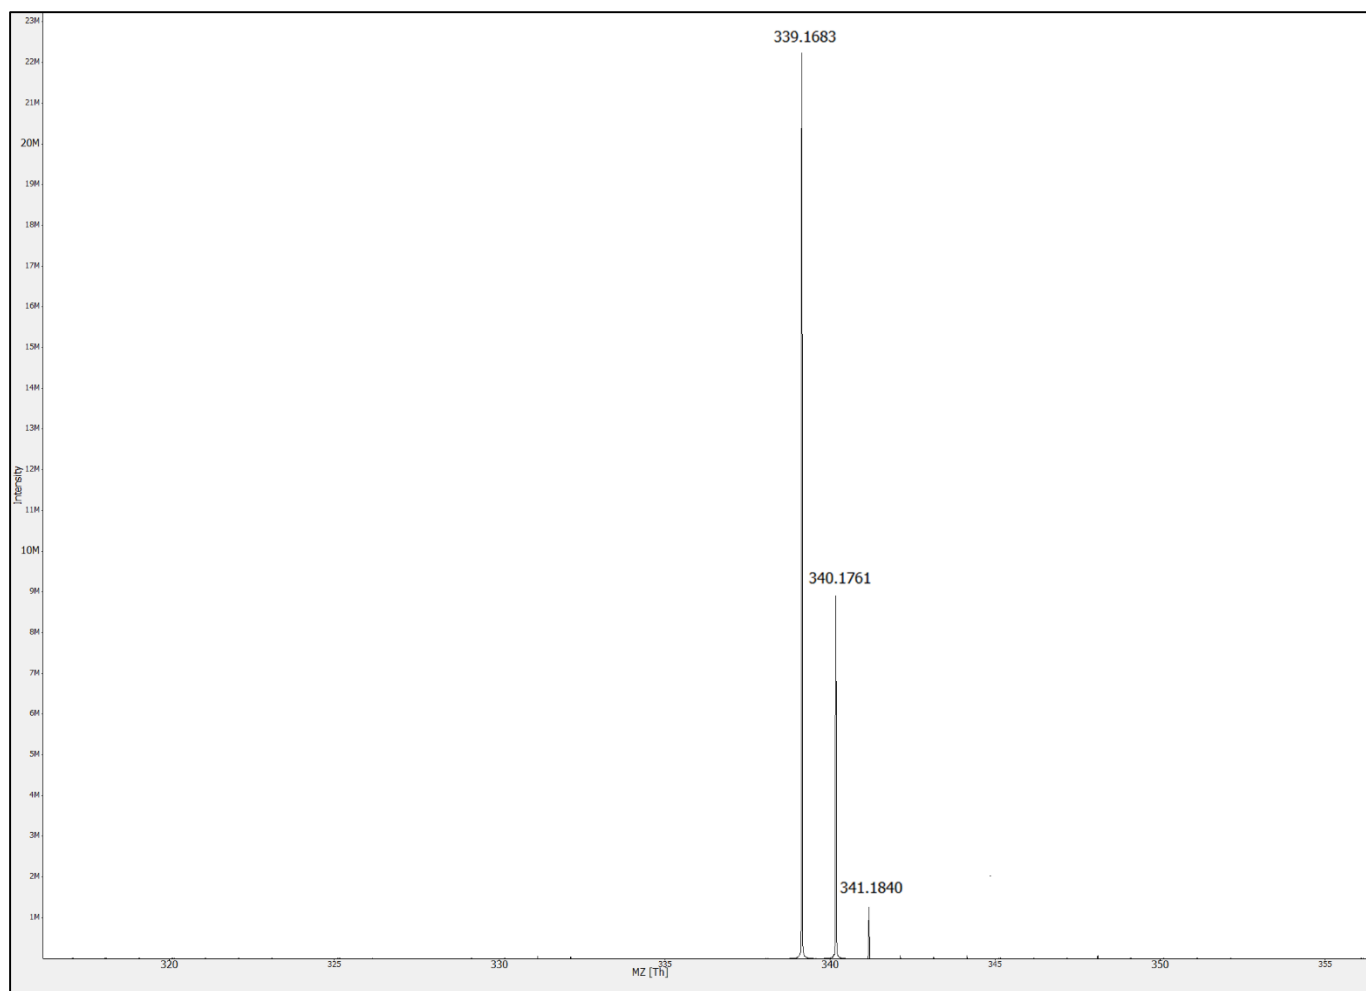

**Figure S2.** 600 MHz  $^1\text{H}$  NMR spectrum of asperopiperazine A (**1**) ( $\text{CD}_3\text{OD}$ ).

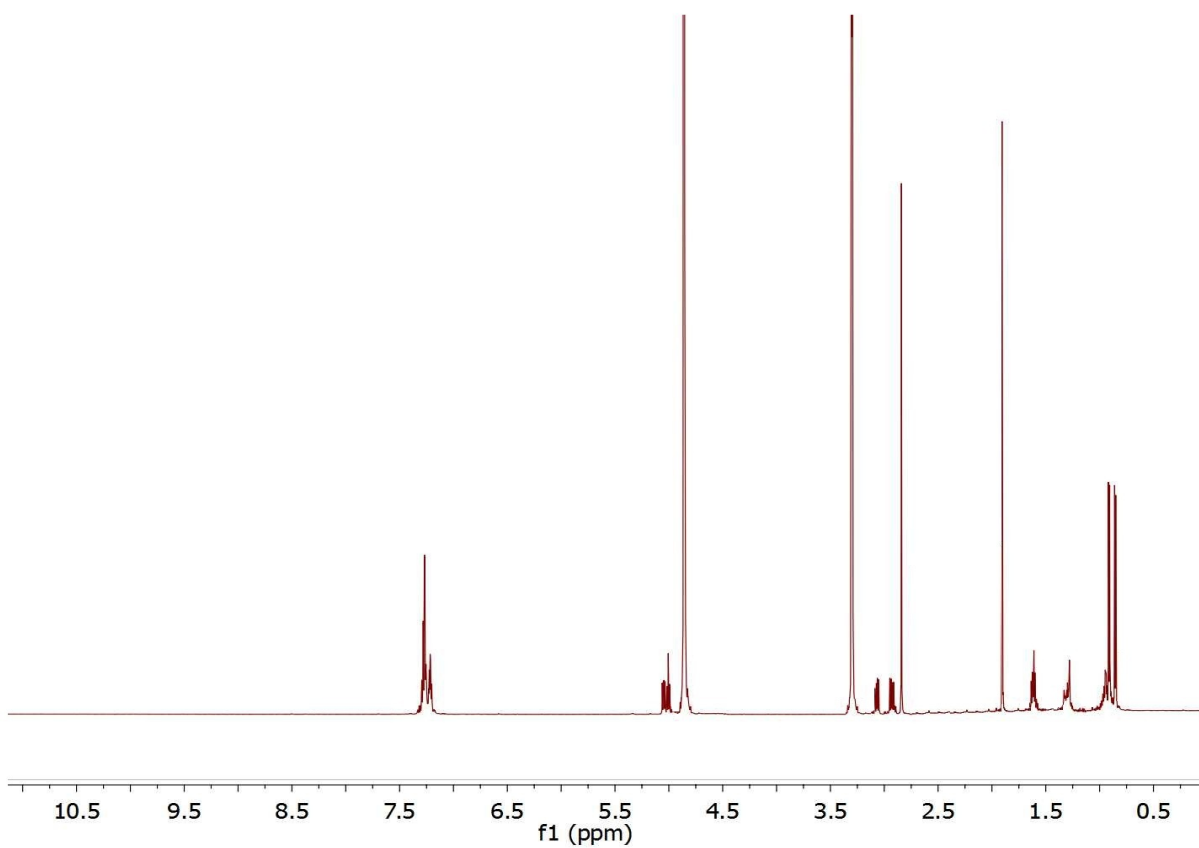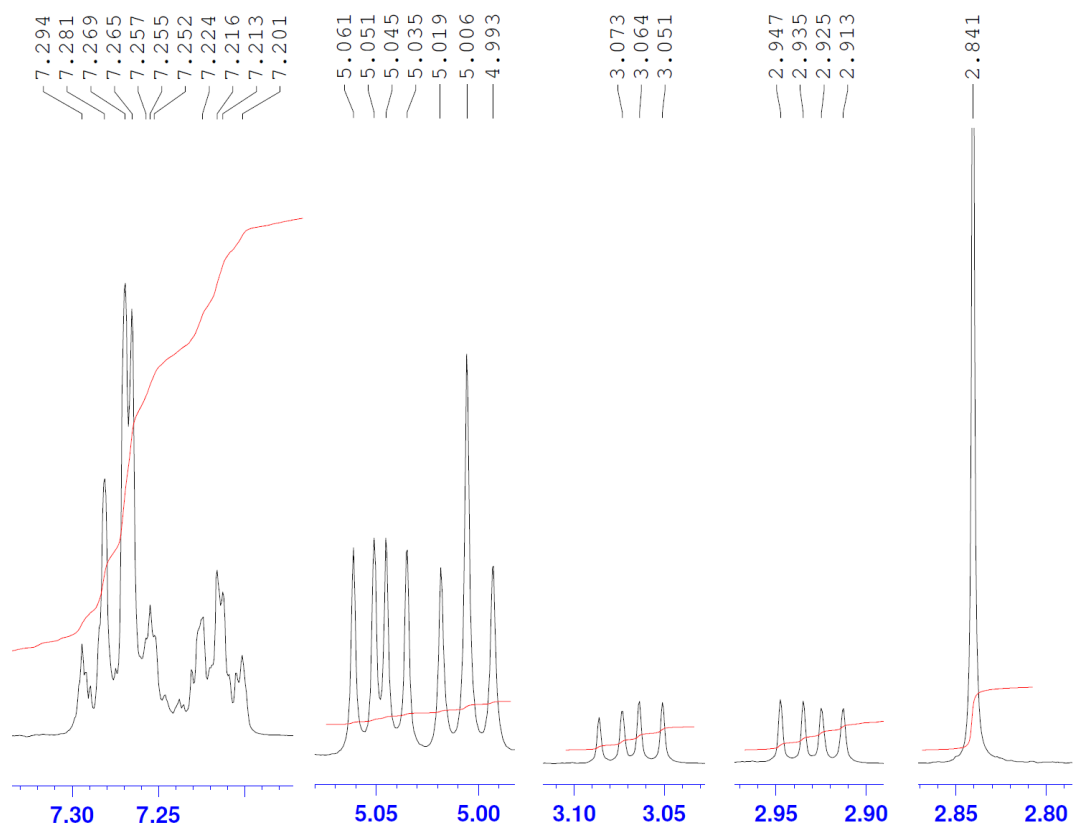

**Figure S2.** 600 MHz  $^1\text{H}$  NMR spectrum of asperopiperazine A (**1**) ( $\text{CD}_3\text{OD}$ ) (Cont.).

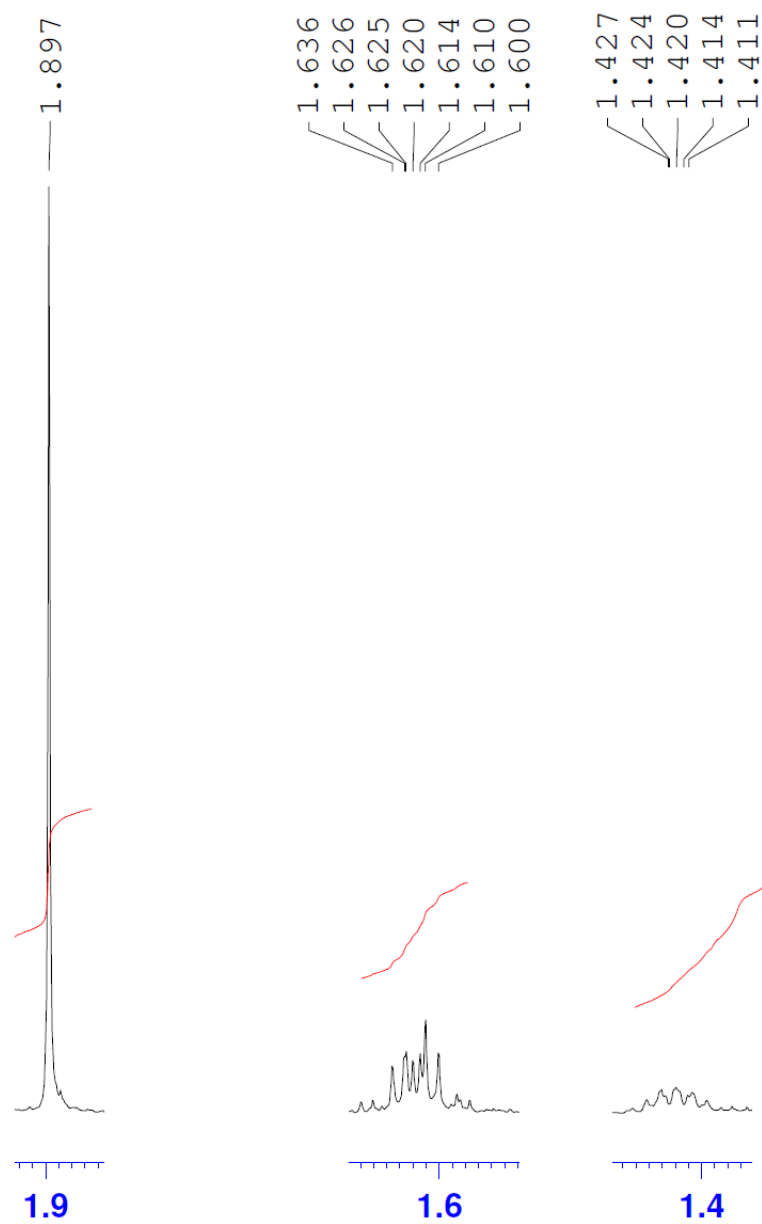

**Figure S3.** 150 MHz  $^{13}\text{C}$  NMR spectrum of asperopiperazine A (**1**) ( $\text{CD}_3\text{OD}$ ).

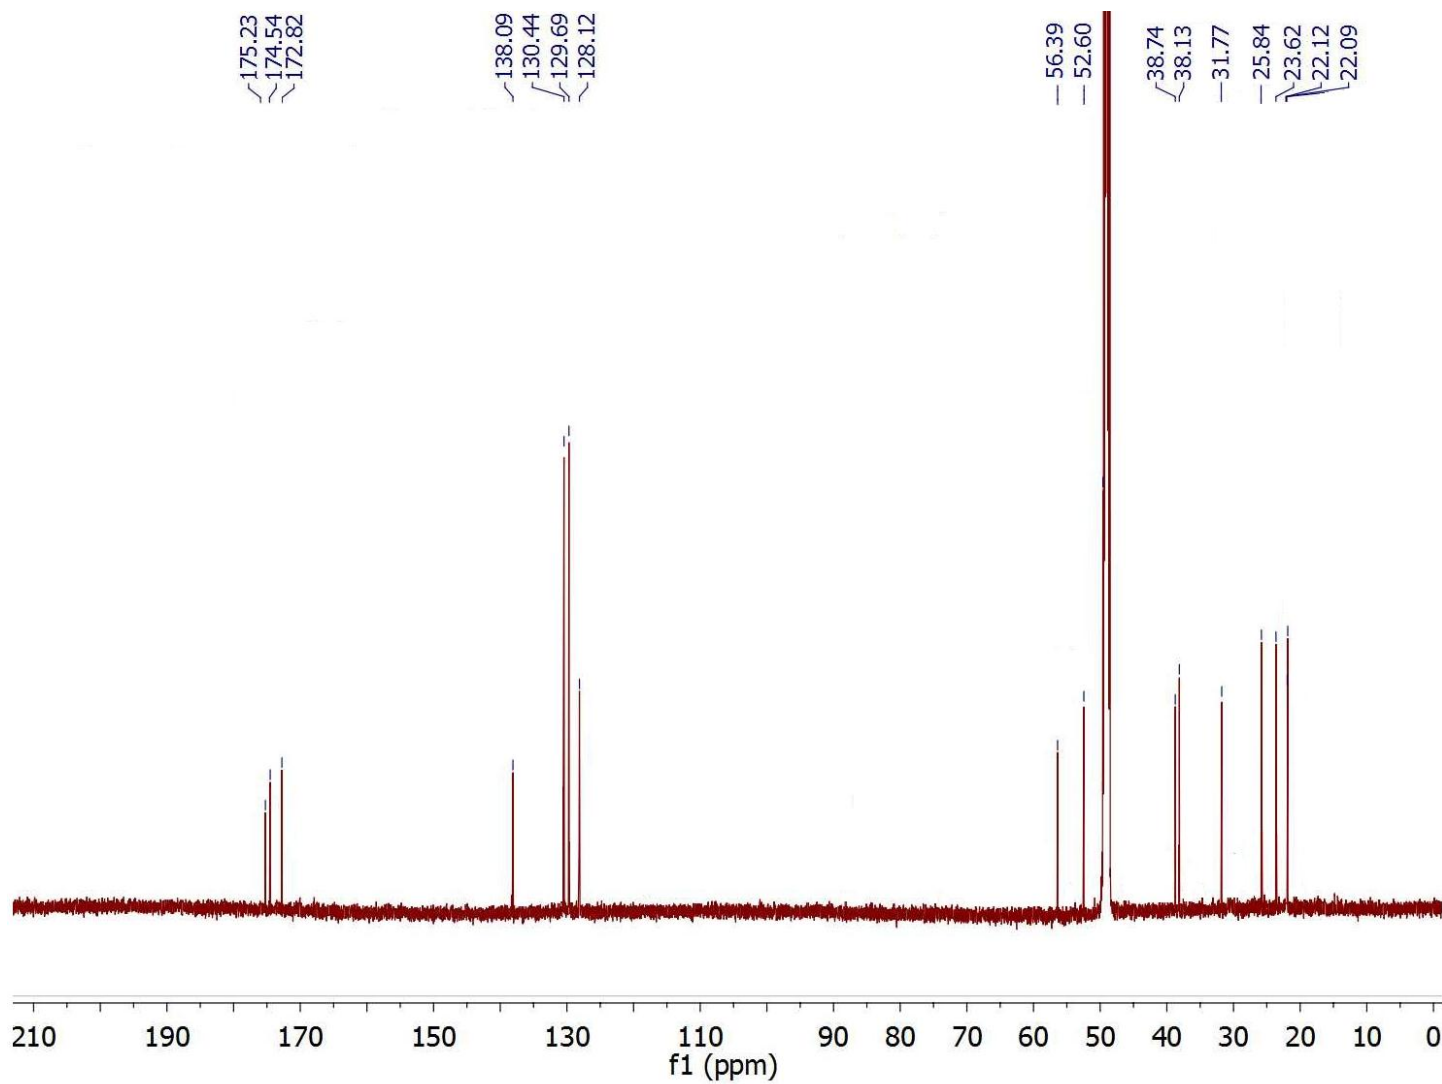

**Figure S4.** DEPT spectrum of asperopiperazine A (**1**) (CD<sub>3</sub>OD).

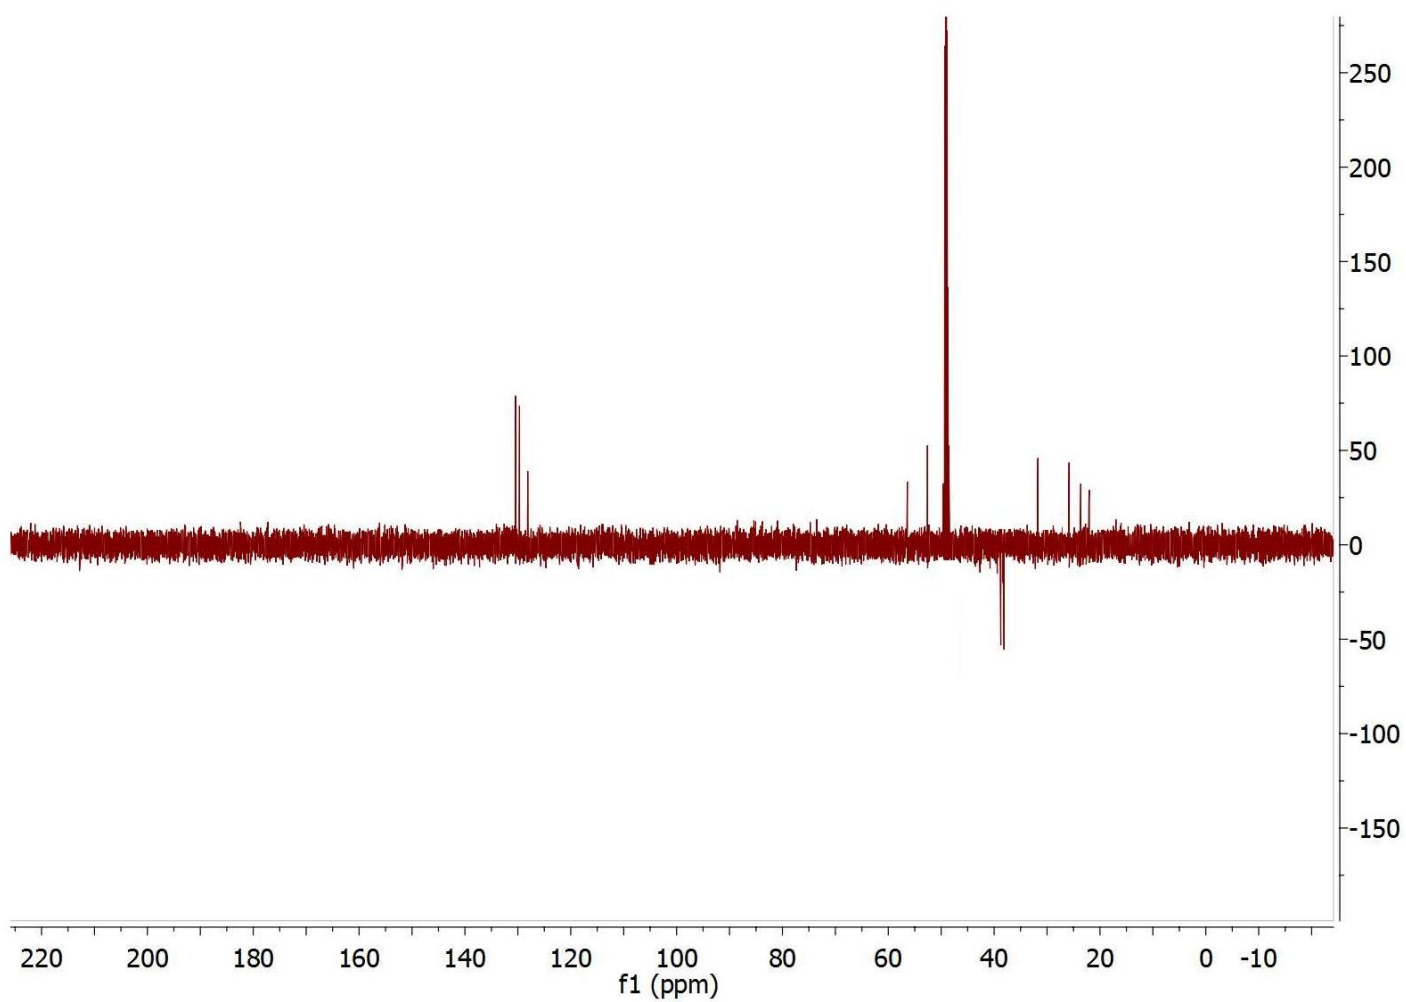

**Figure S5.** COSY spectrum of asperopiperazine A (**1**) (CD<sub>3</sub>OD).

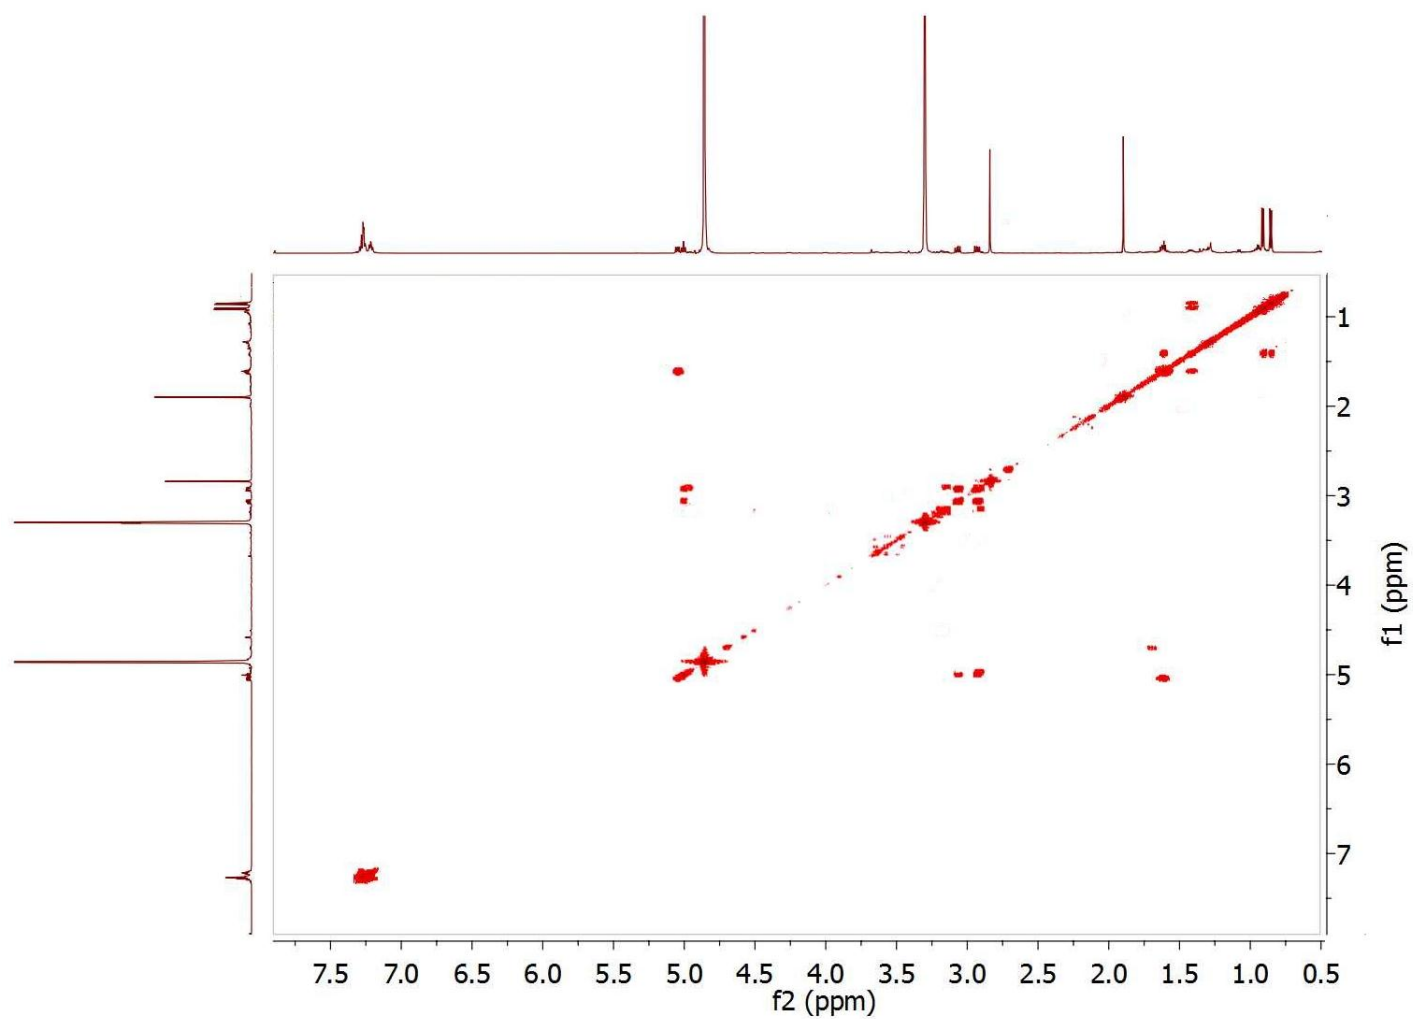

**Figure S6.** HSQC spectrum of asperopiperazine A (**1**) (CD<sub>3</sub>OD).

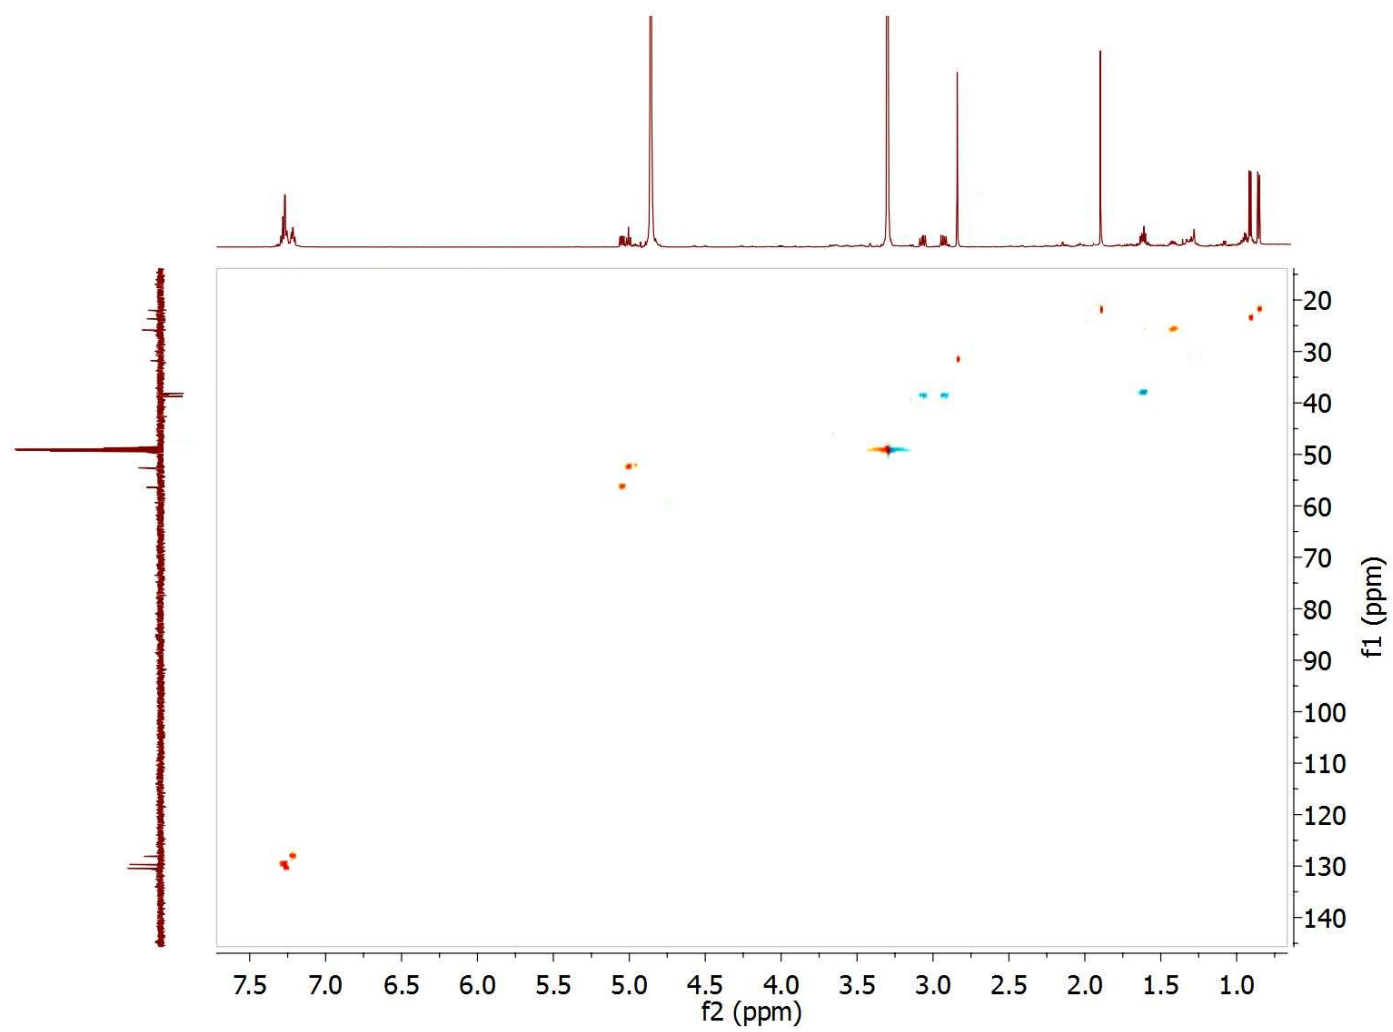



**Figure S7.** HMBC spectrum of asperopiperazine A (**1**) (CD<sub>3</sub>OD).

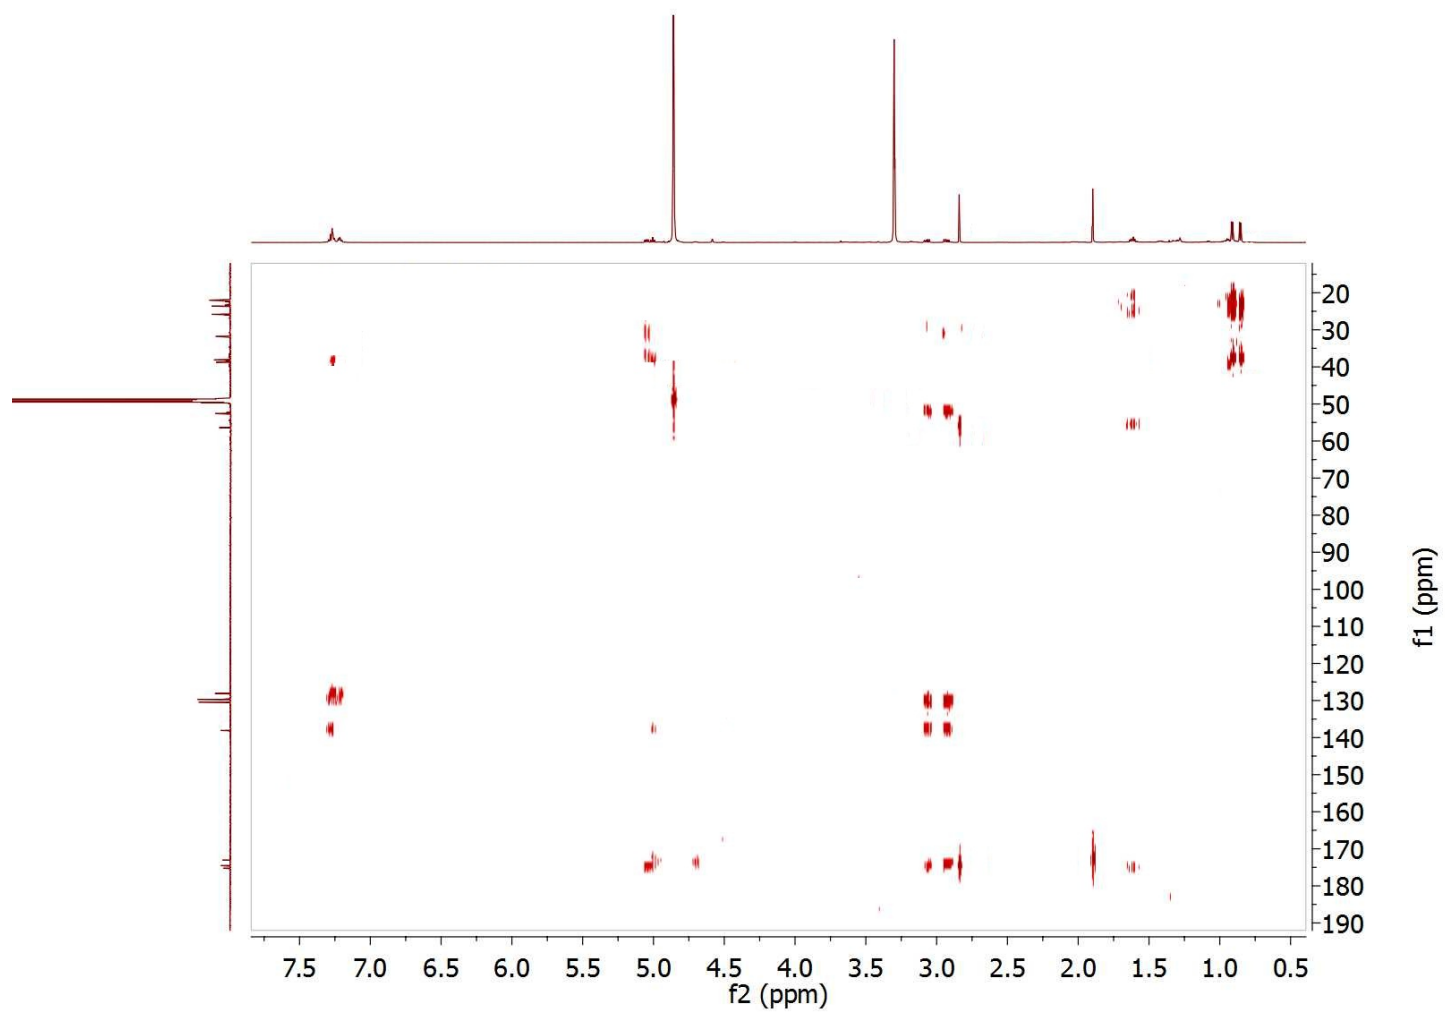

**Figure S8.** HRESIMS spectrum of asperopiperazine B (2).

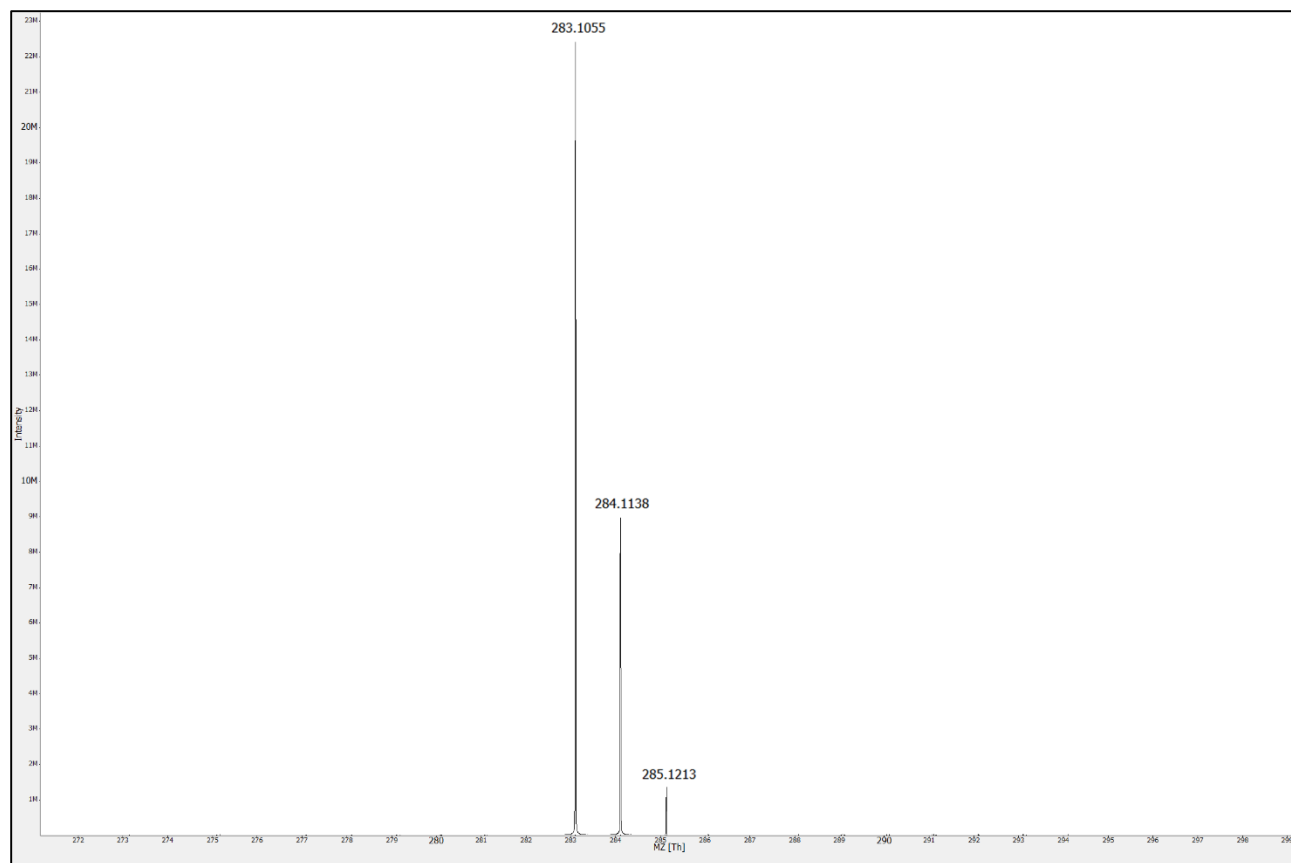

Figure S9. 850 MHz  $^1\text{H}$  NMR spectrum of asperopiperazine B (**2**) ( $\text{CDCl}_3$ ).

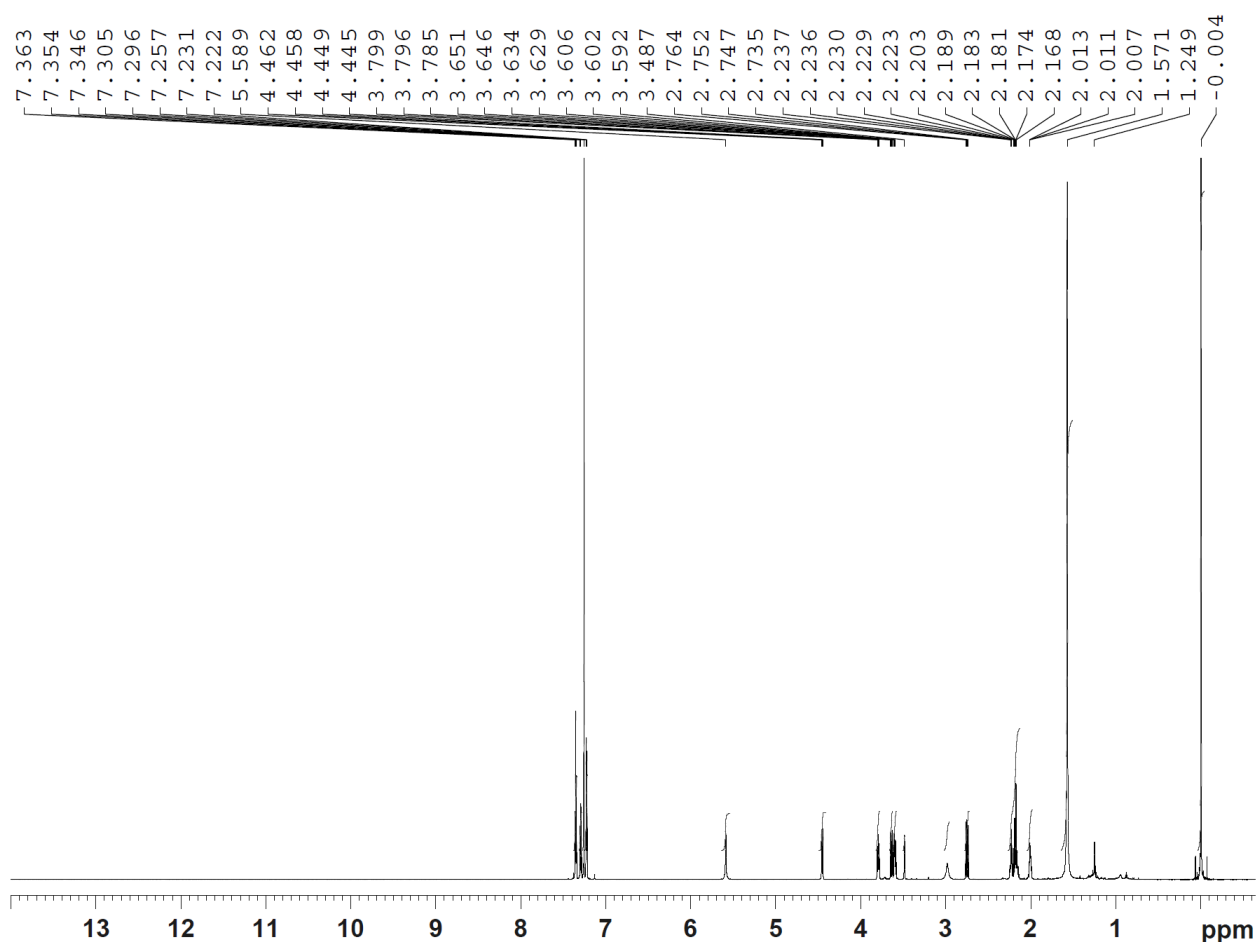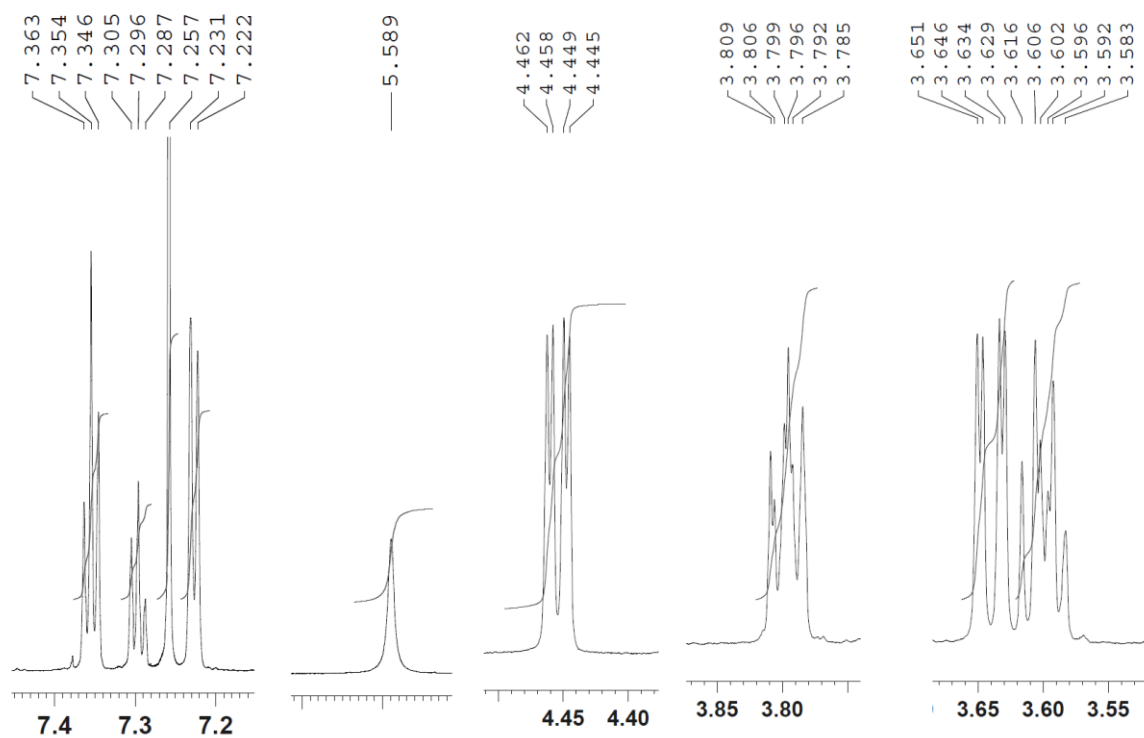

**Figure S9.** 850 MHz  $^1\text{H}$  NMR spectrum of asperopiperazine B (**2**) ( $\text{CDCl}_3$ ) (Cont.).

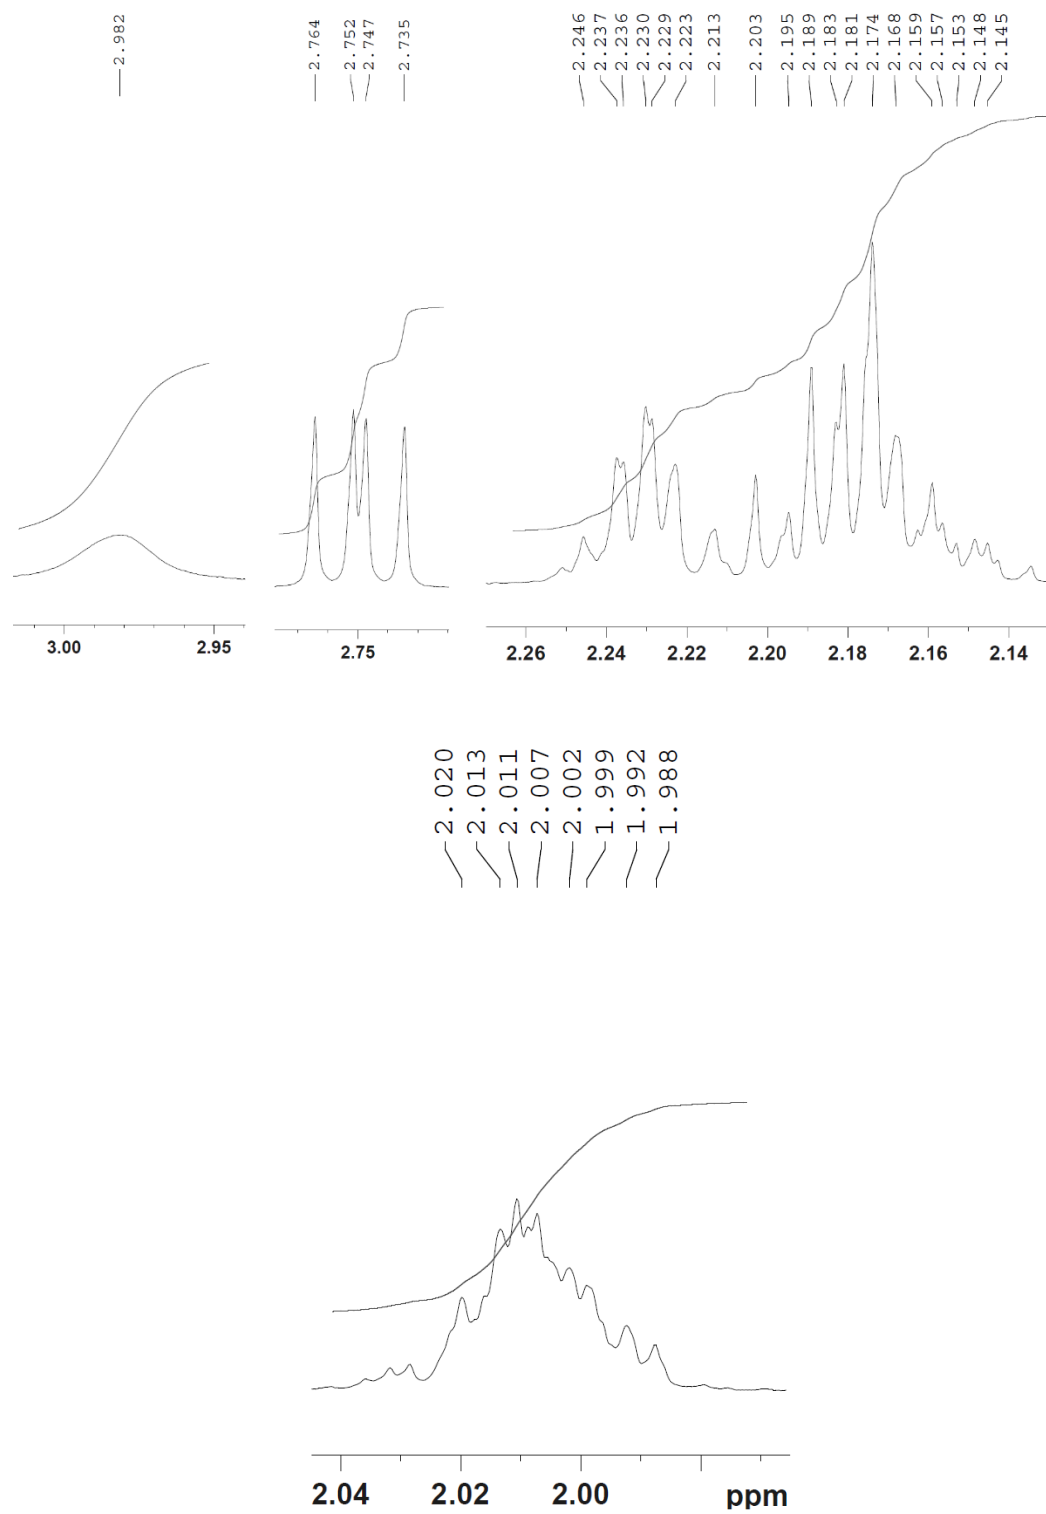

**Figure S10.** 213 MHz  $^{13}\text{C}$  NMR spectrum of asperopiperazine B (**2**) ( $\text{CDCl}_3$ ).

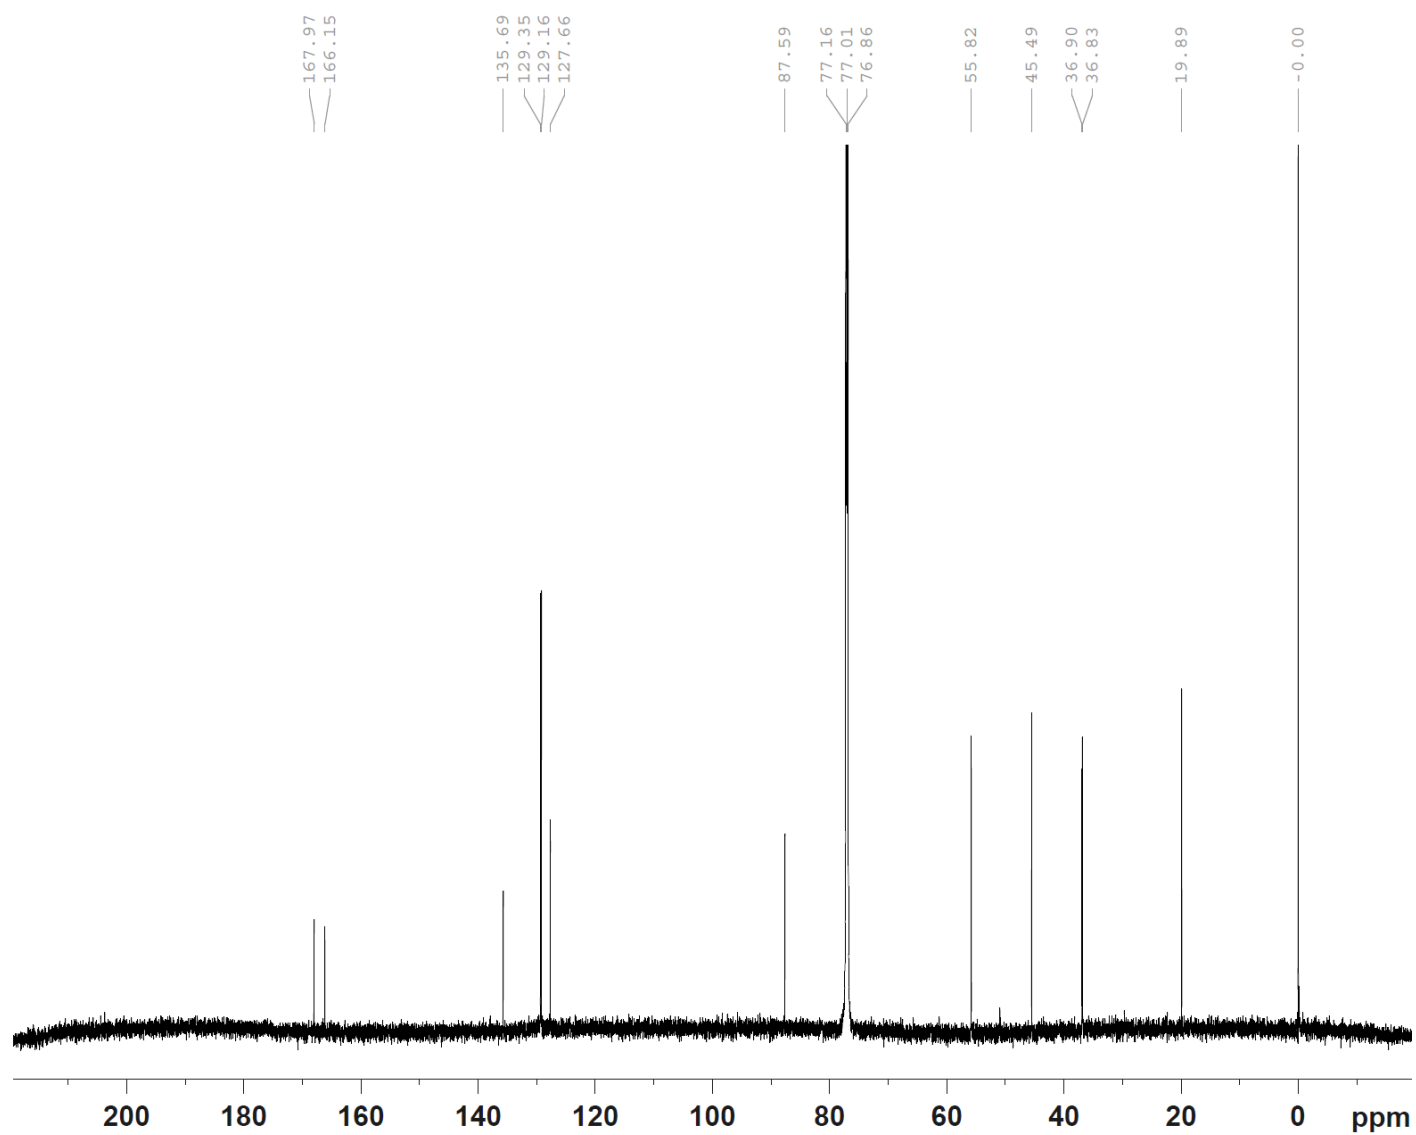

**Figure S11.** COSY spectrum of asperopiperazine B (**2**) ( $\text{CDCl}_3$ ).

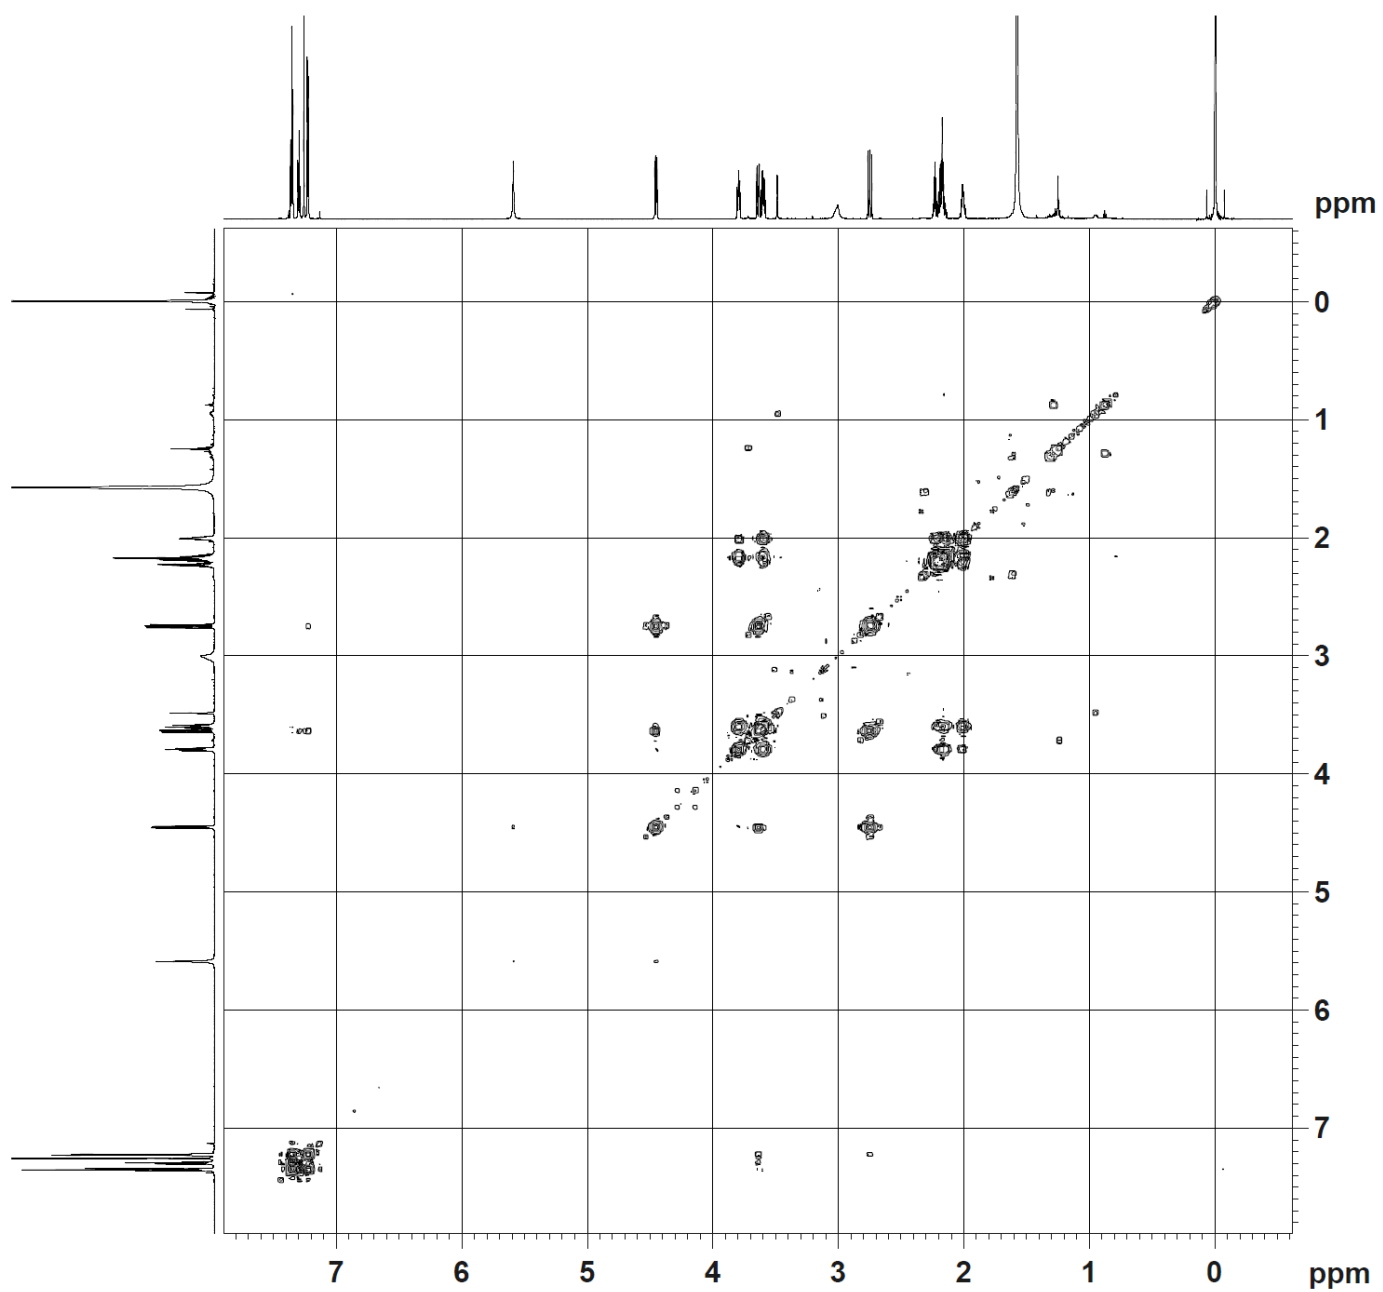

Figure S12. HSQC spectrum of asperopiperazine B (2) ( $\text{CDCl}_3$ ).

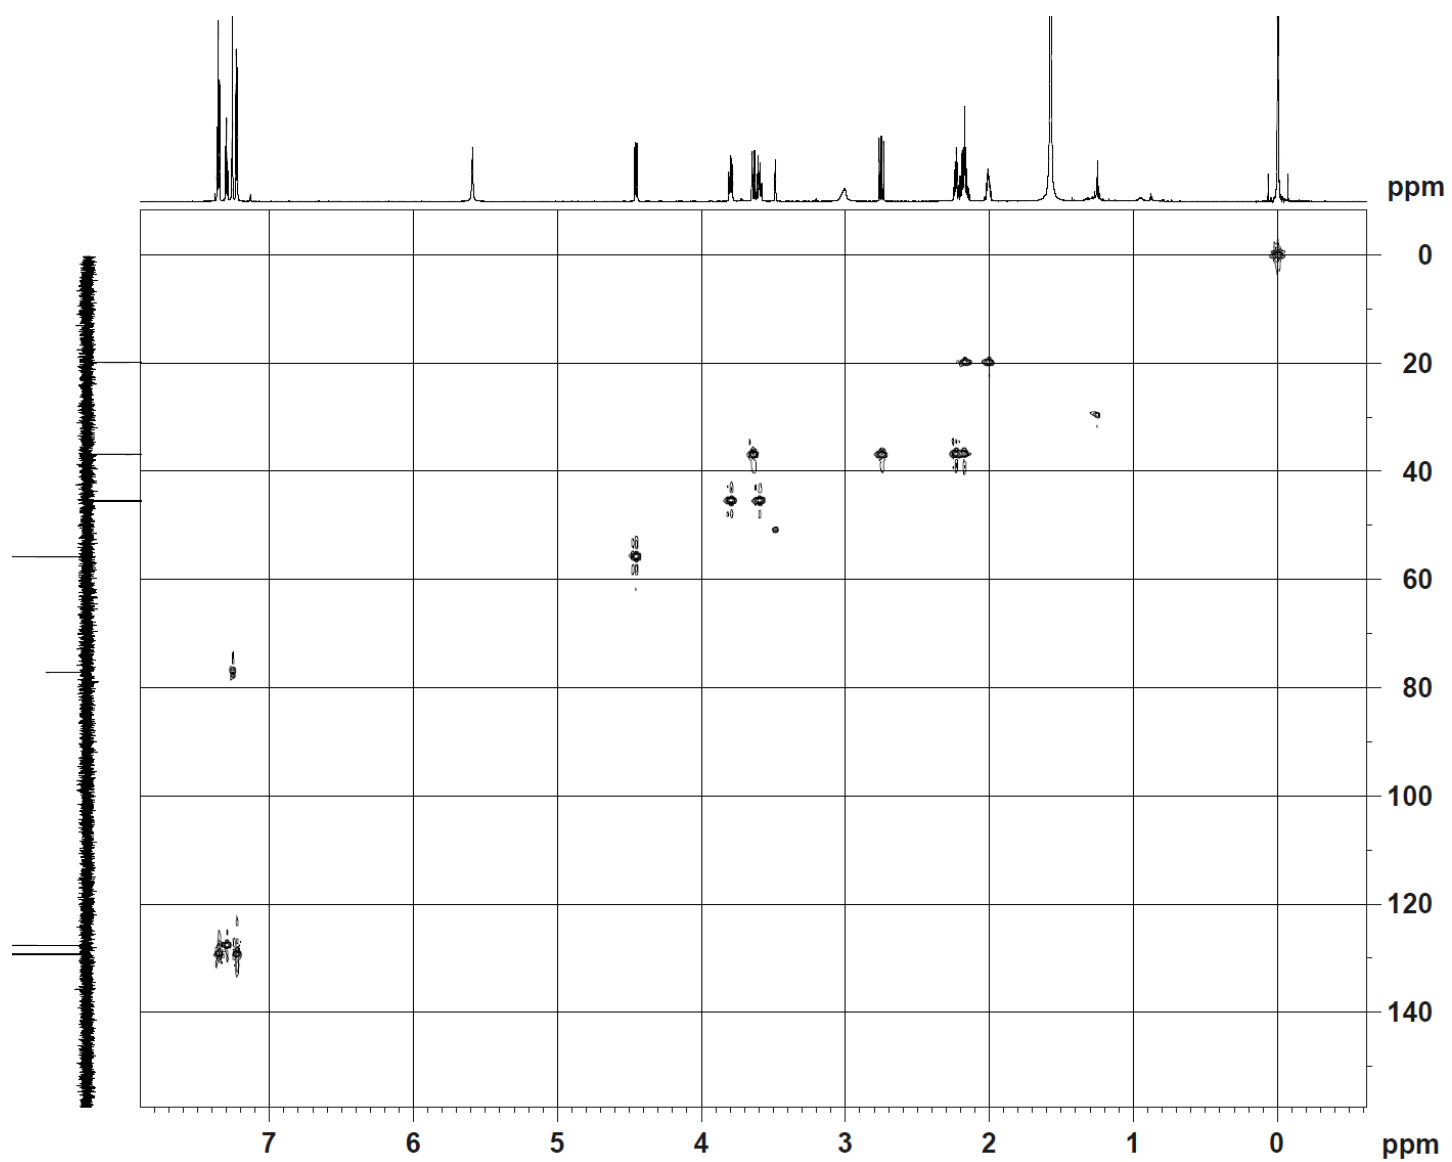

**Figure S13.** HMBC spectrum of asperopiperazine B (**2**) ( $\text{CDCl}_3$ ).

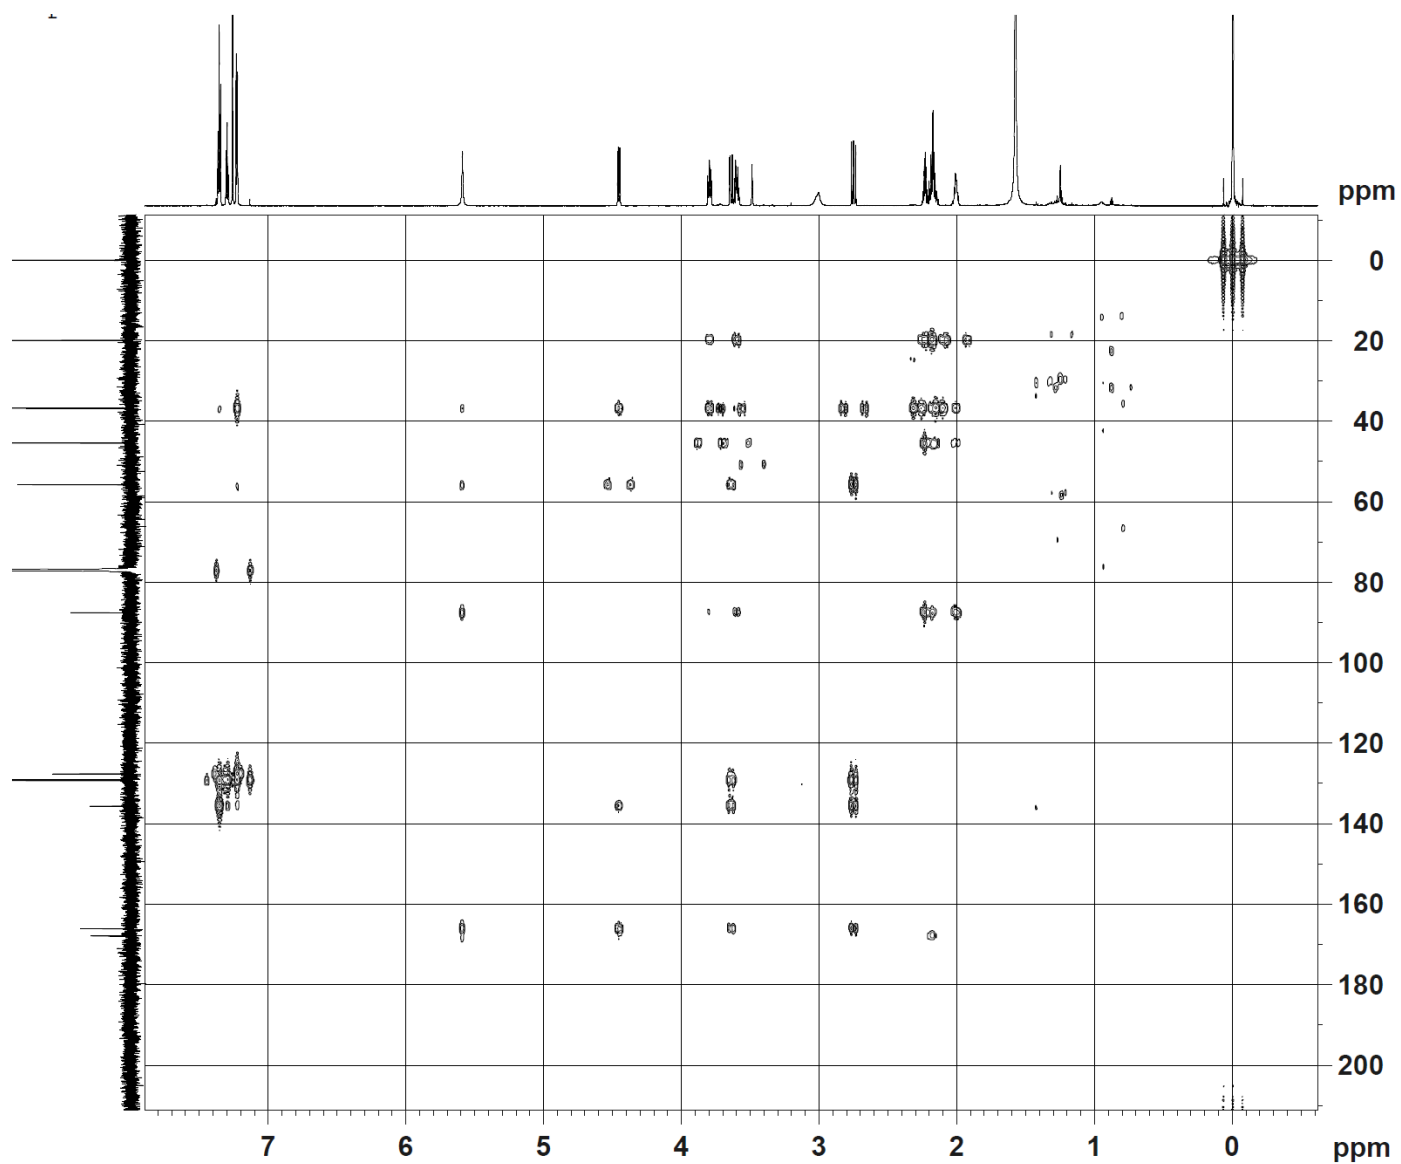



**Figure S14.** NOESY spectrum of asperopiperazine B (**2**) ( $\text{CDCl}_3$ ).

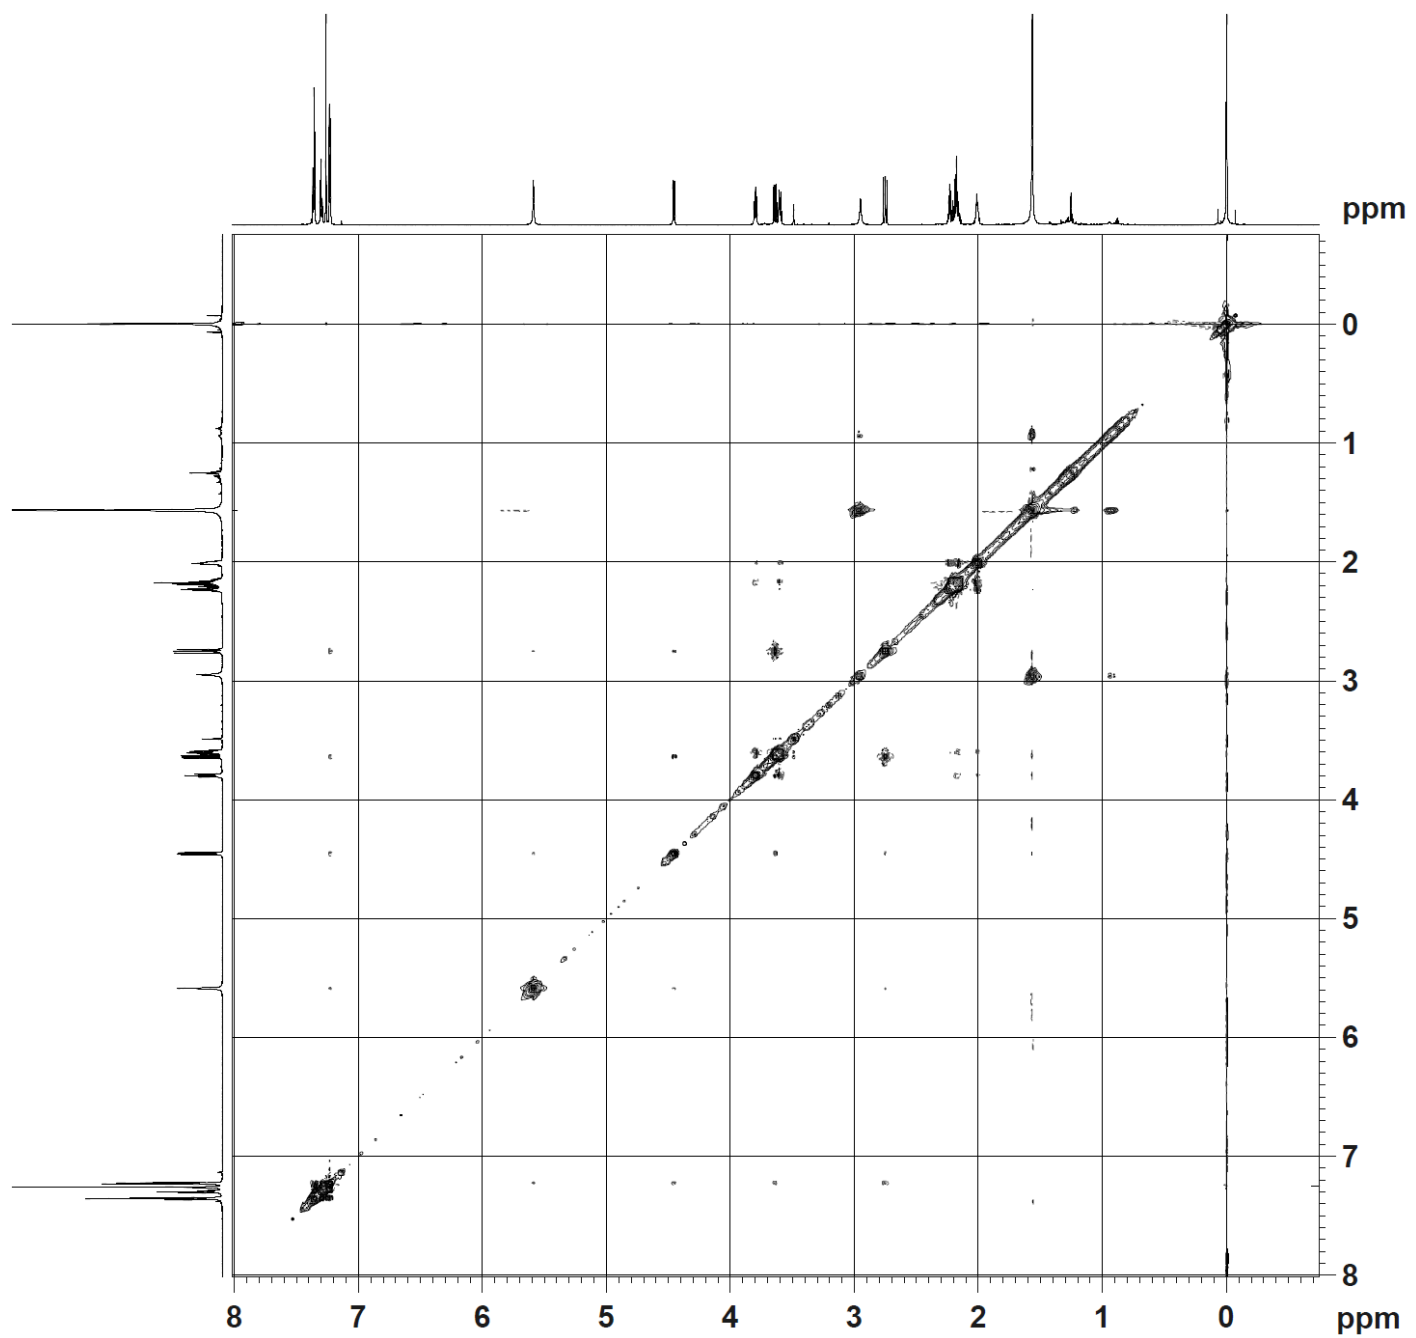

**Figure 15.** HRESIMS spectrum of (+)-citreoisocoumarin (**3**).

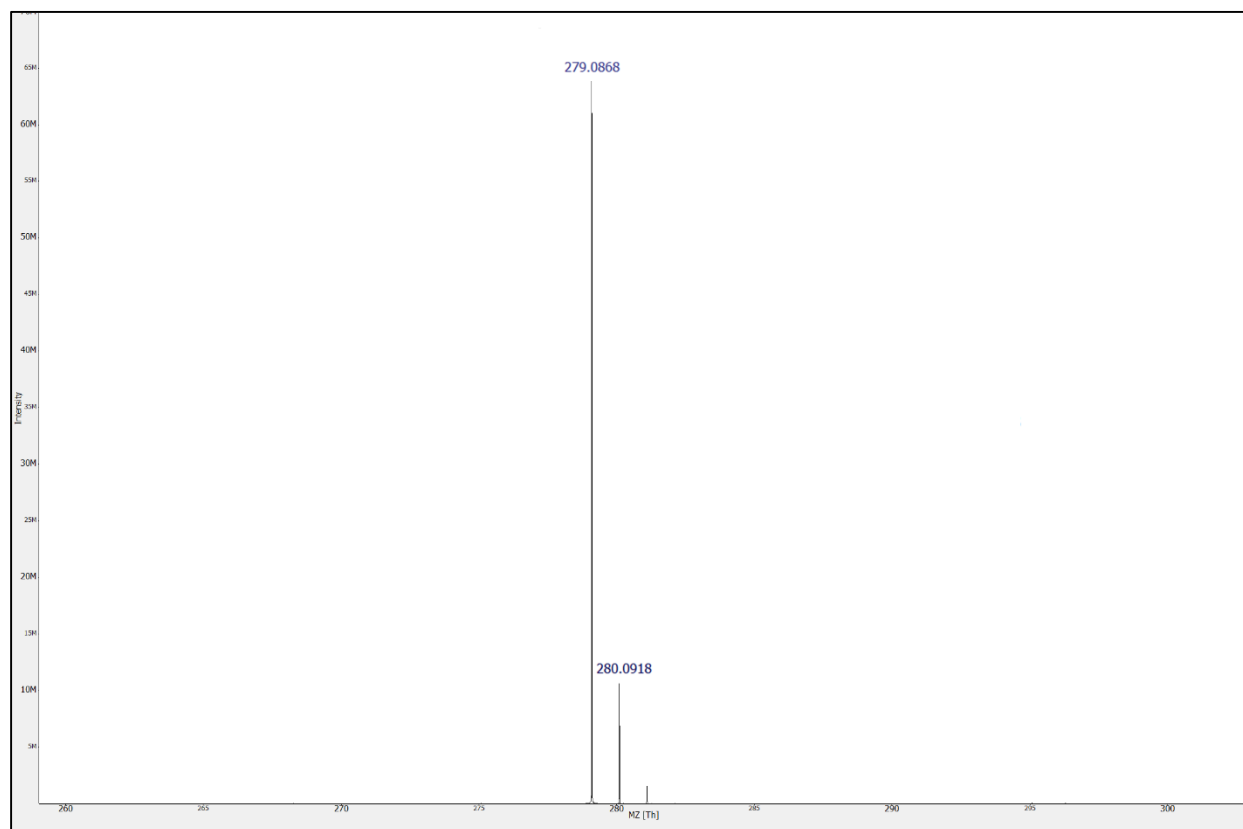

**Figure S16.** 600 MHz  $^1\text{H}$  NMR spectrum of (+)-citreoisocoumarin (**3**) ( $\text{CDCl}_3$ ).

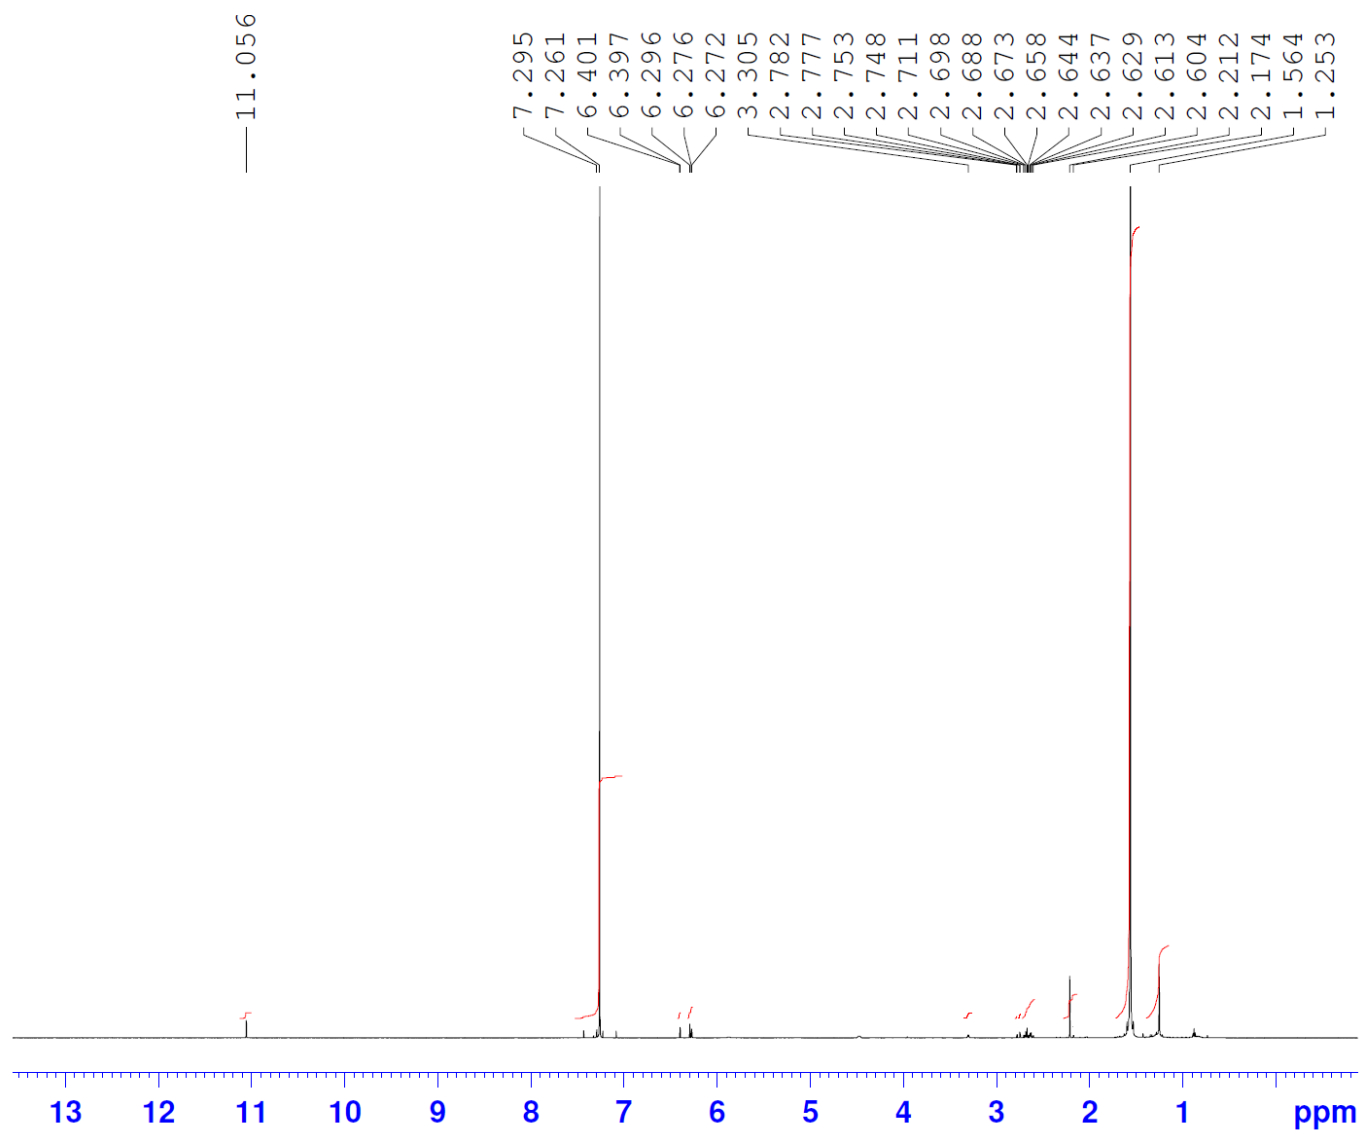

**Figure S16.** 600 MHz  $^1\text{H}$  NMR spectrum of (+)-citreisocoumarin (**3**) ( $\text{CDCl}_3$ ) (Cont.).

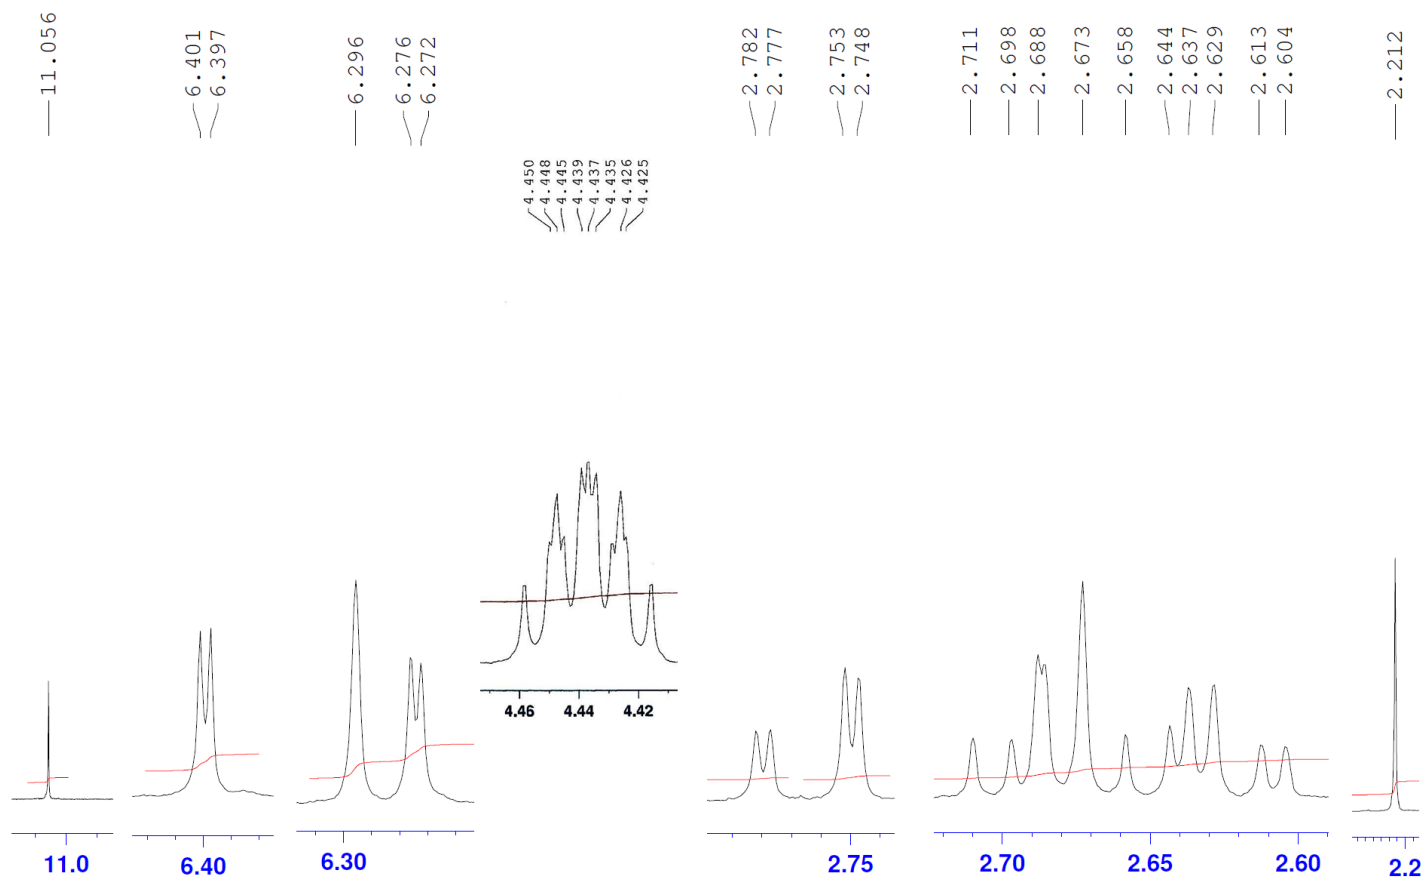

**Figure S17.** 150 MHz  $^{13}\text{C}$  NMR spectrum of (+)-citreoisocoumarin (**3**) ( $\text{CDCl}_3$ ).

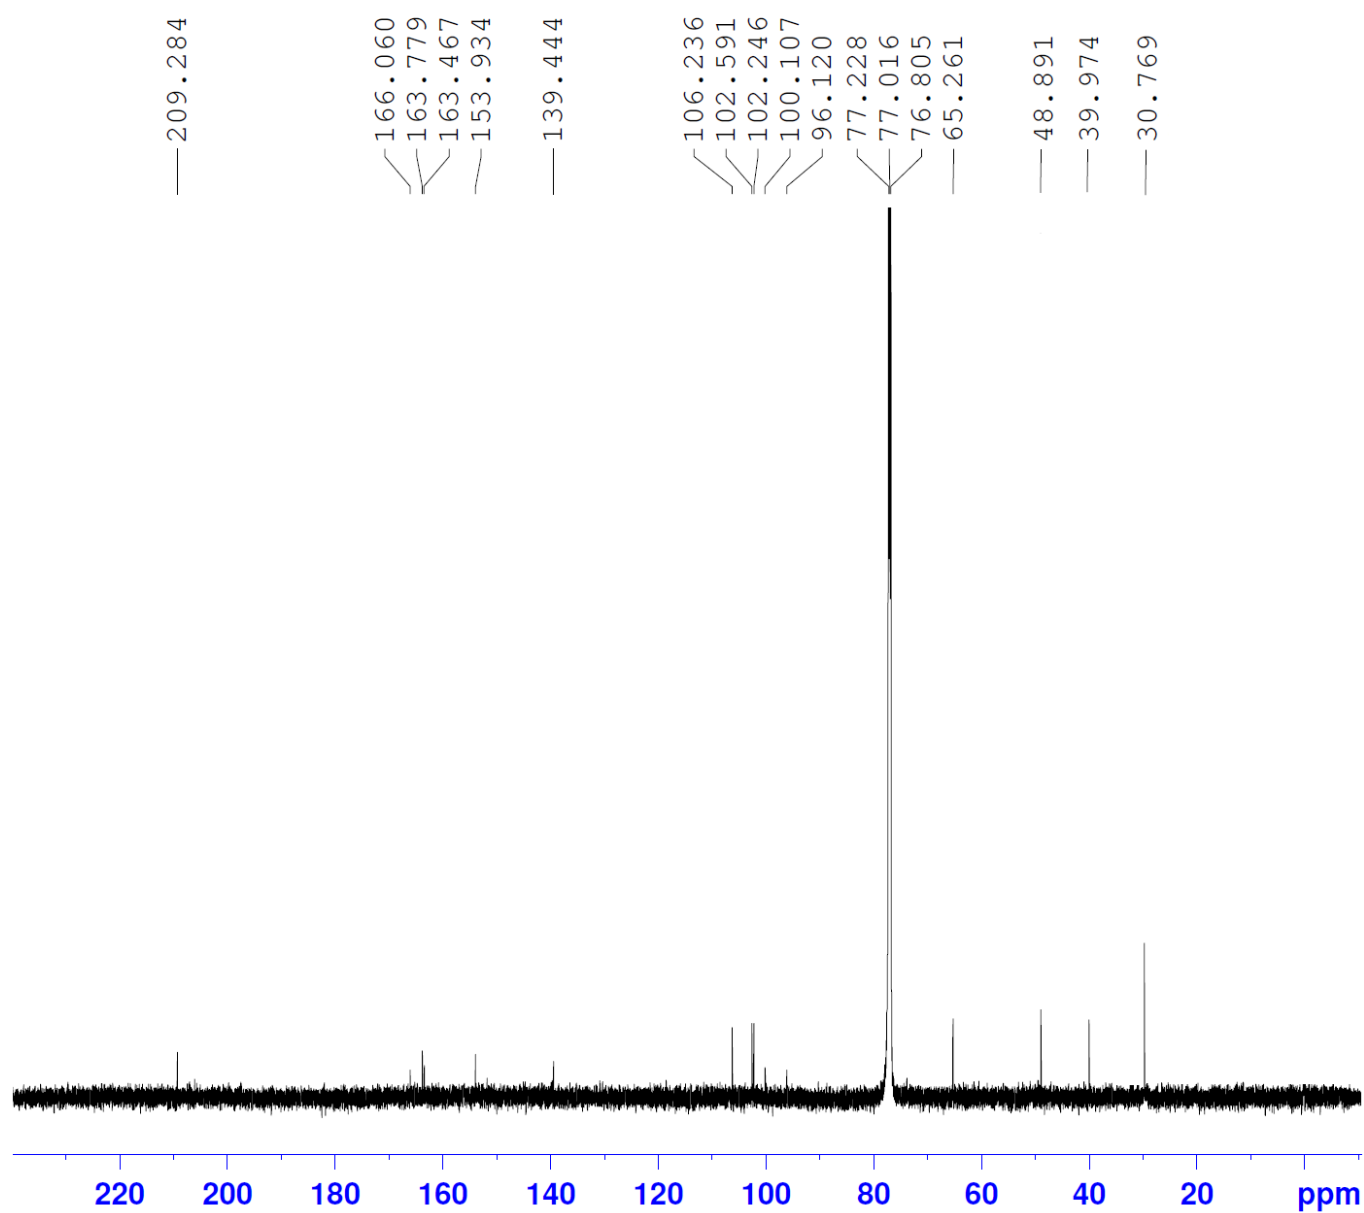

**Figure S18.** COSY spectrum of (+)-citreoisocoumarin (**3**) (CDCl<sub>3</sub>).

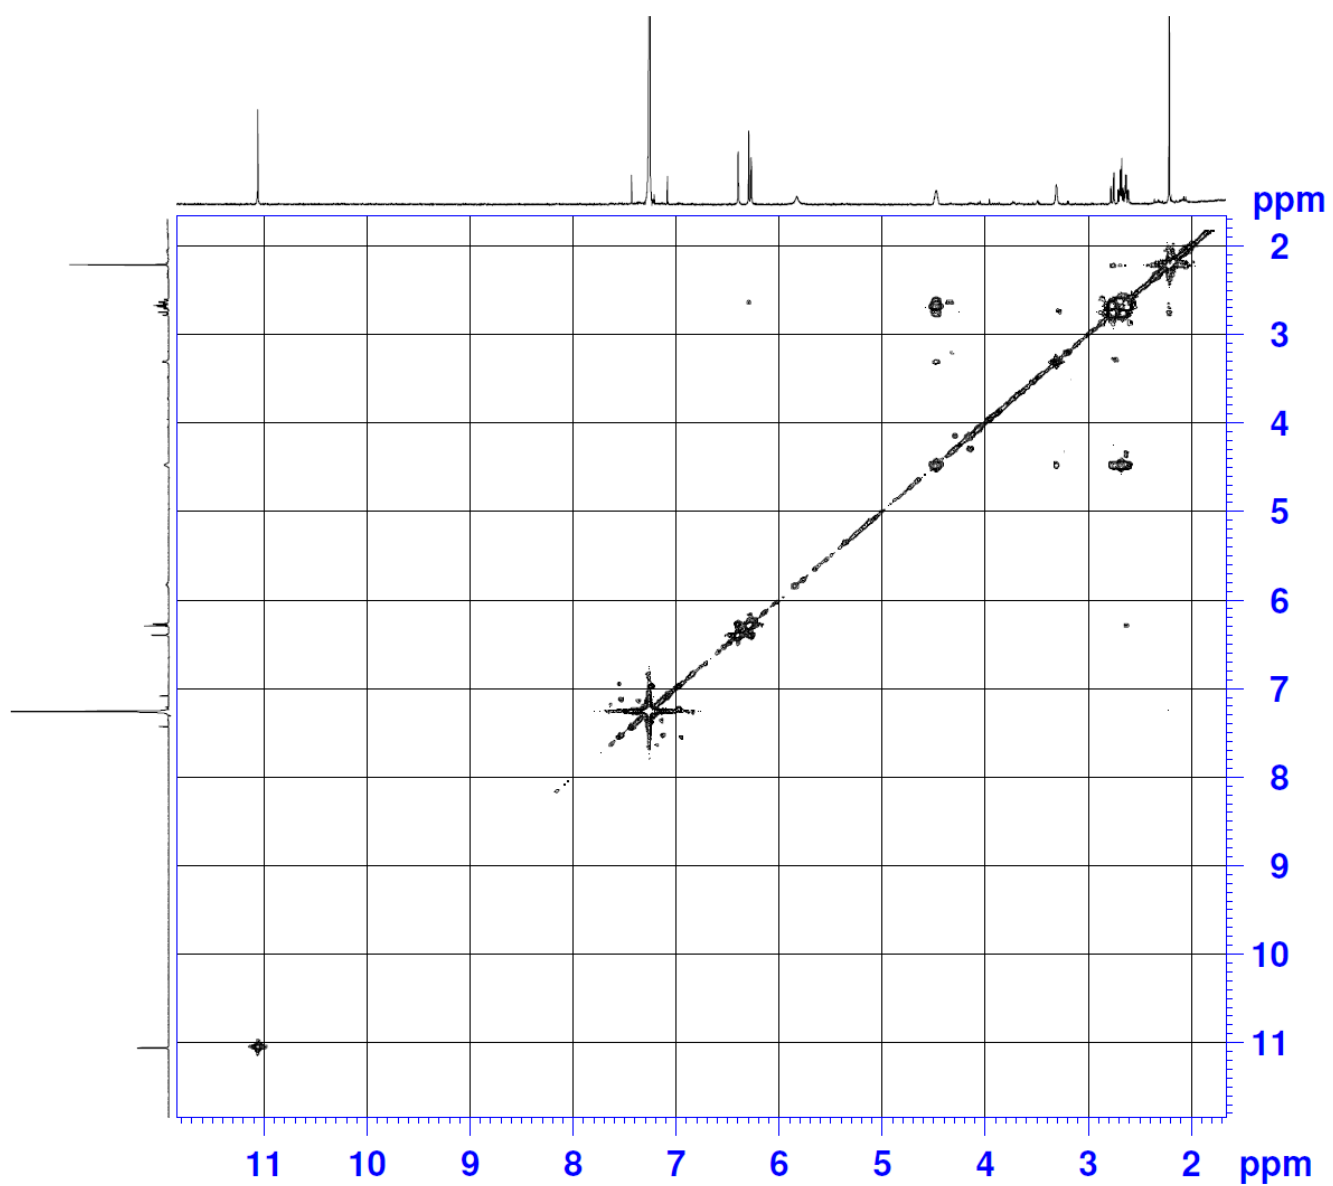

**Figure S19.** HSQC spectrum of (+)-citreoisocoumarin (**3**) (CDCl<sub>3</sub>).

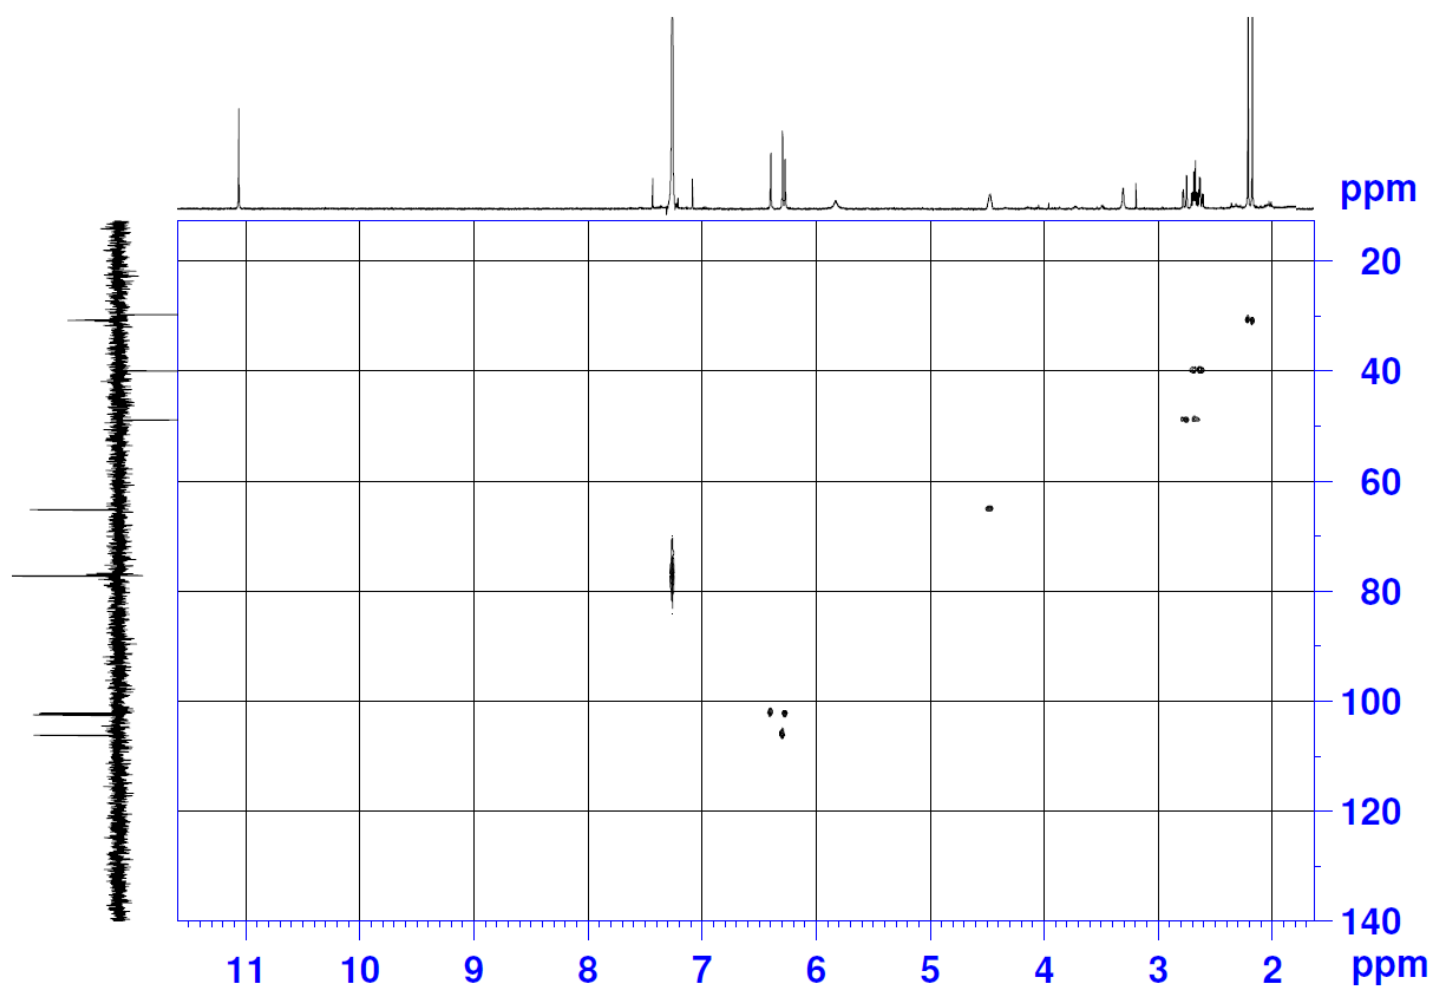

**Figure S20.** HMBC spectrum of (+)-citreisocoumarin (**3**) (CDCl<sub>3</sub>).

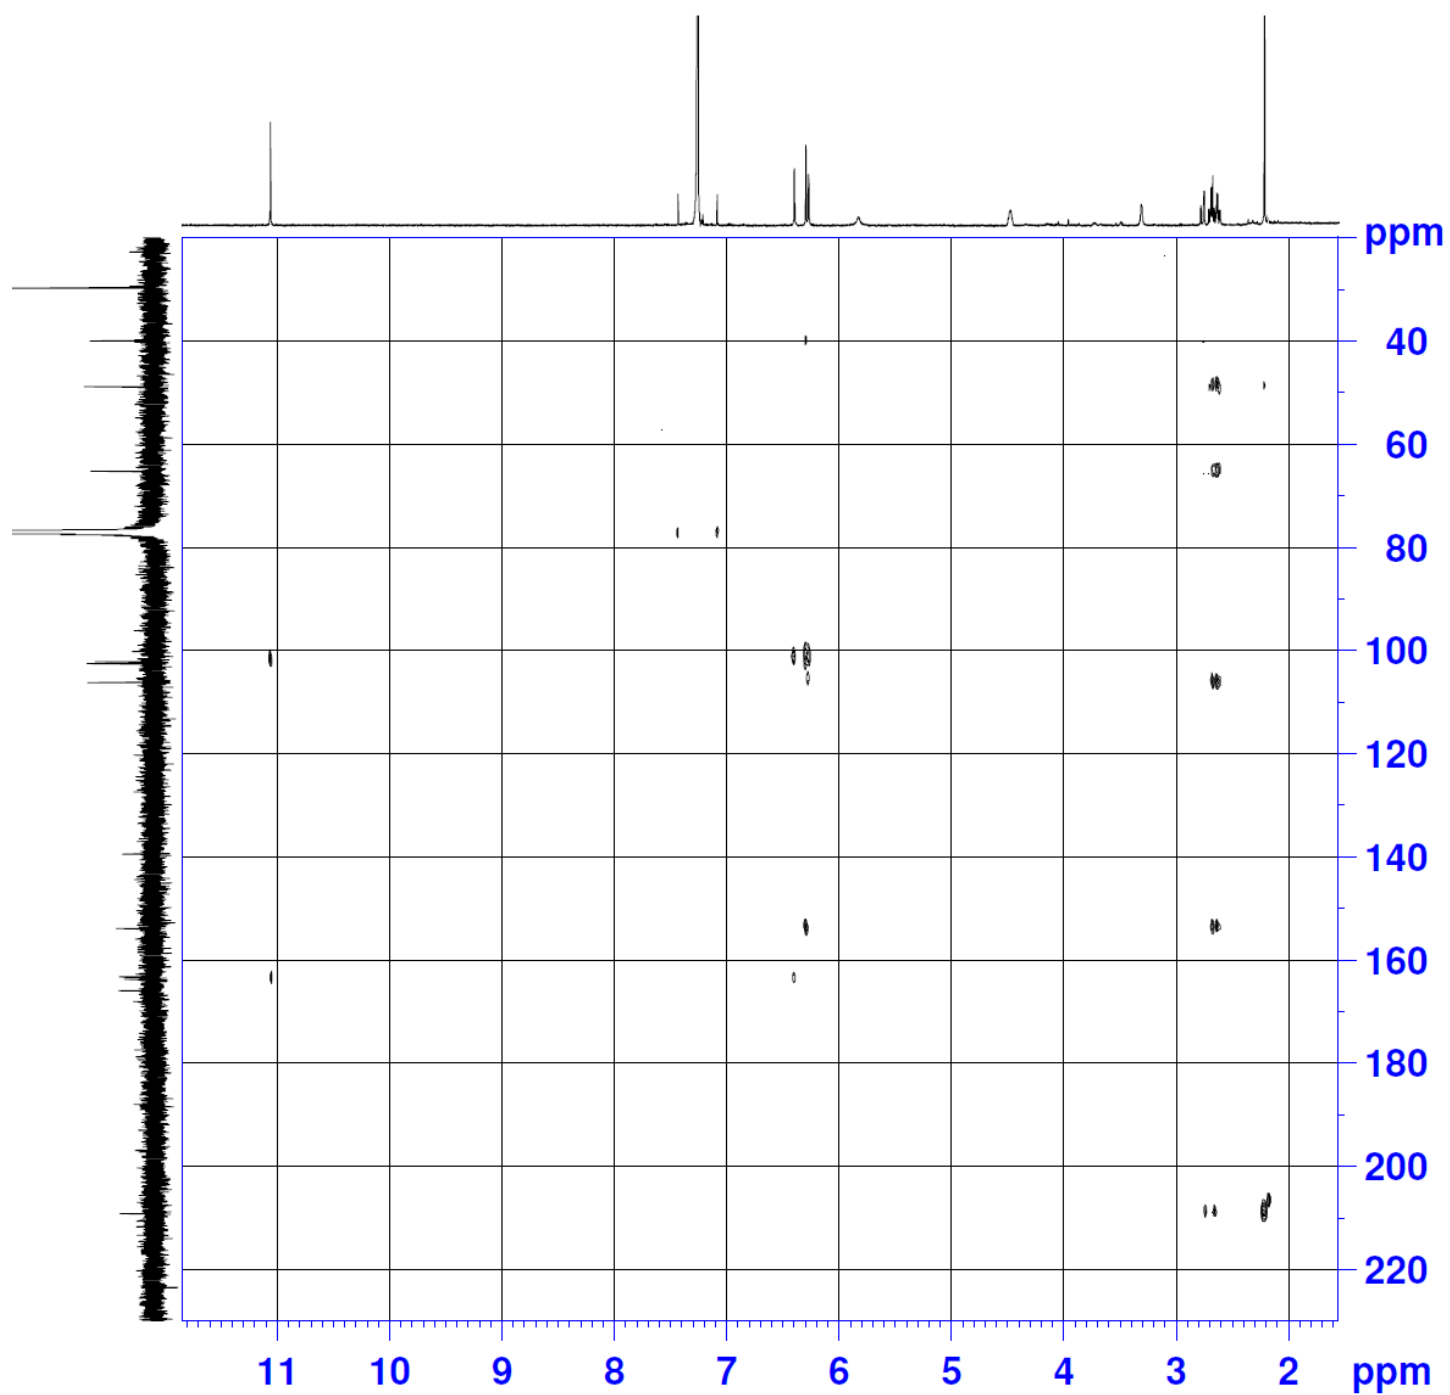



**Figure 21.** HRESIMS spectrum of (–)-6,8-di-*O*-methylocitreoisocoumarin (**4**).

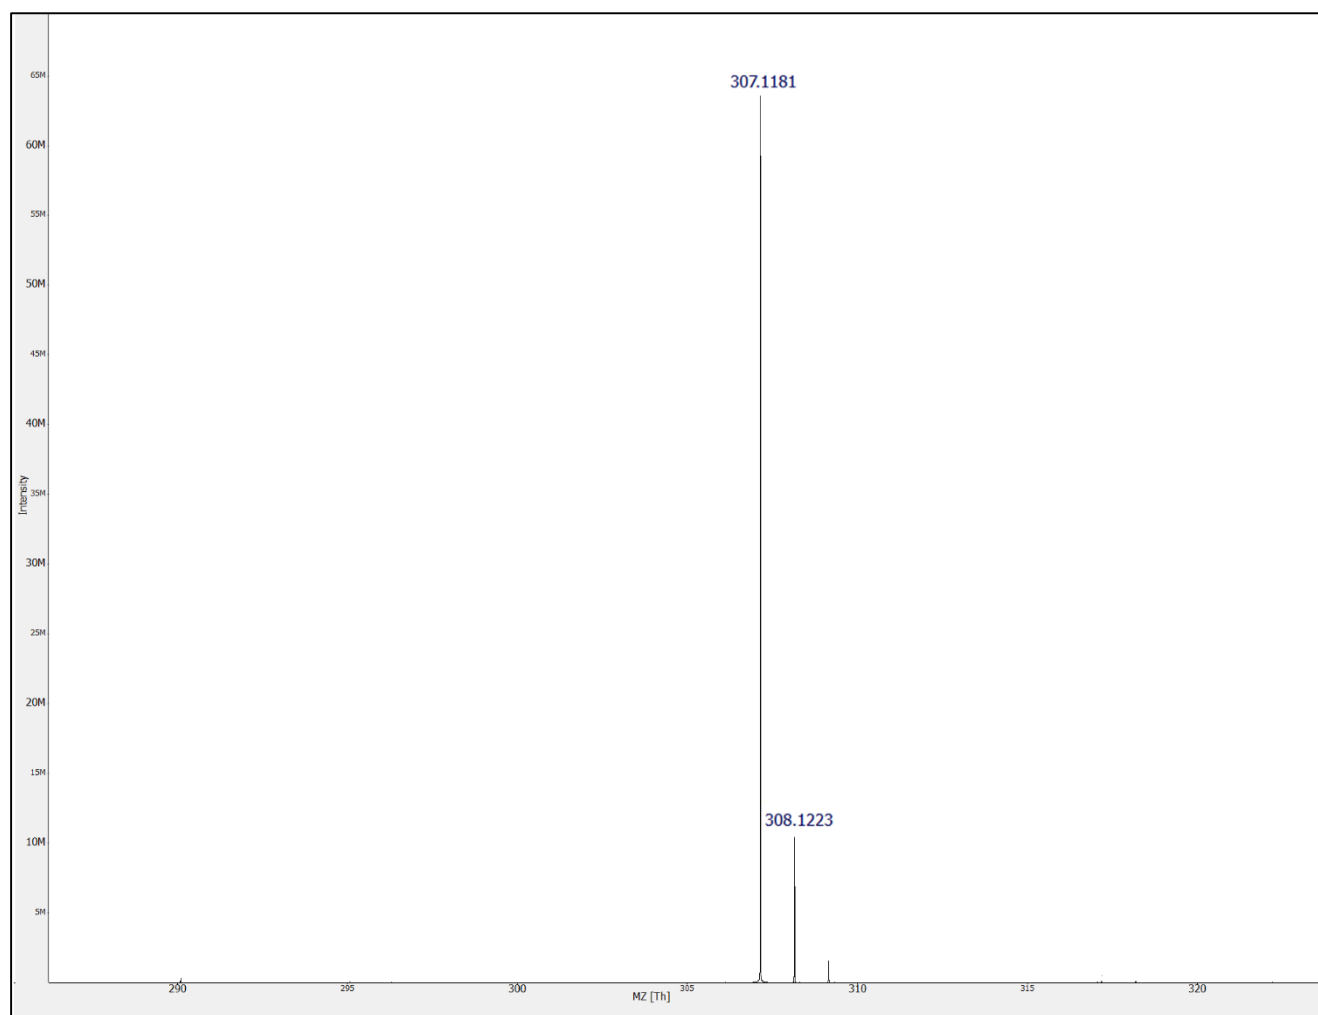

**Figure S22.** 600 MHz  $^1\text{H}$  NMR spectrum of (-)-6,8-di-*O*-methylnitroisocoumarin (**4**) ( $\text{CDCl}_3$ ).

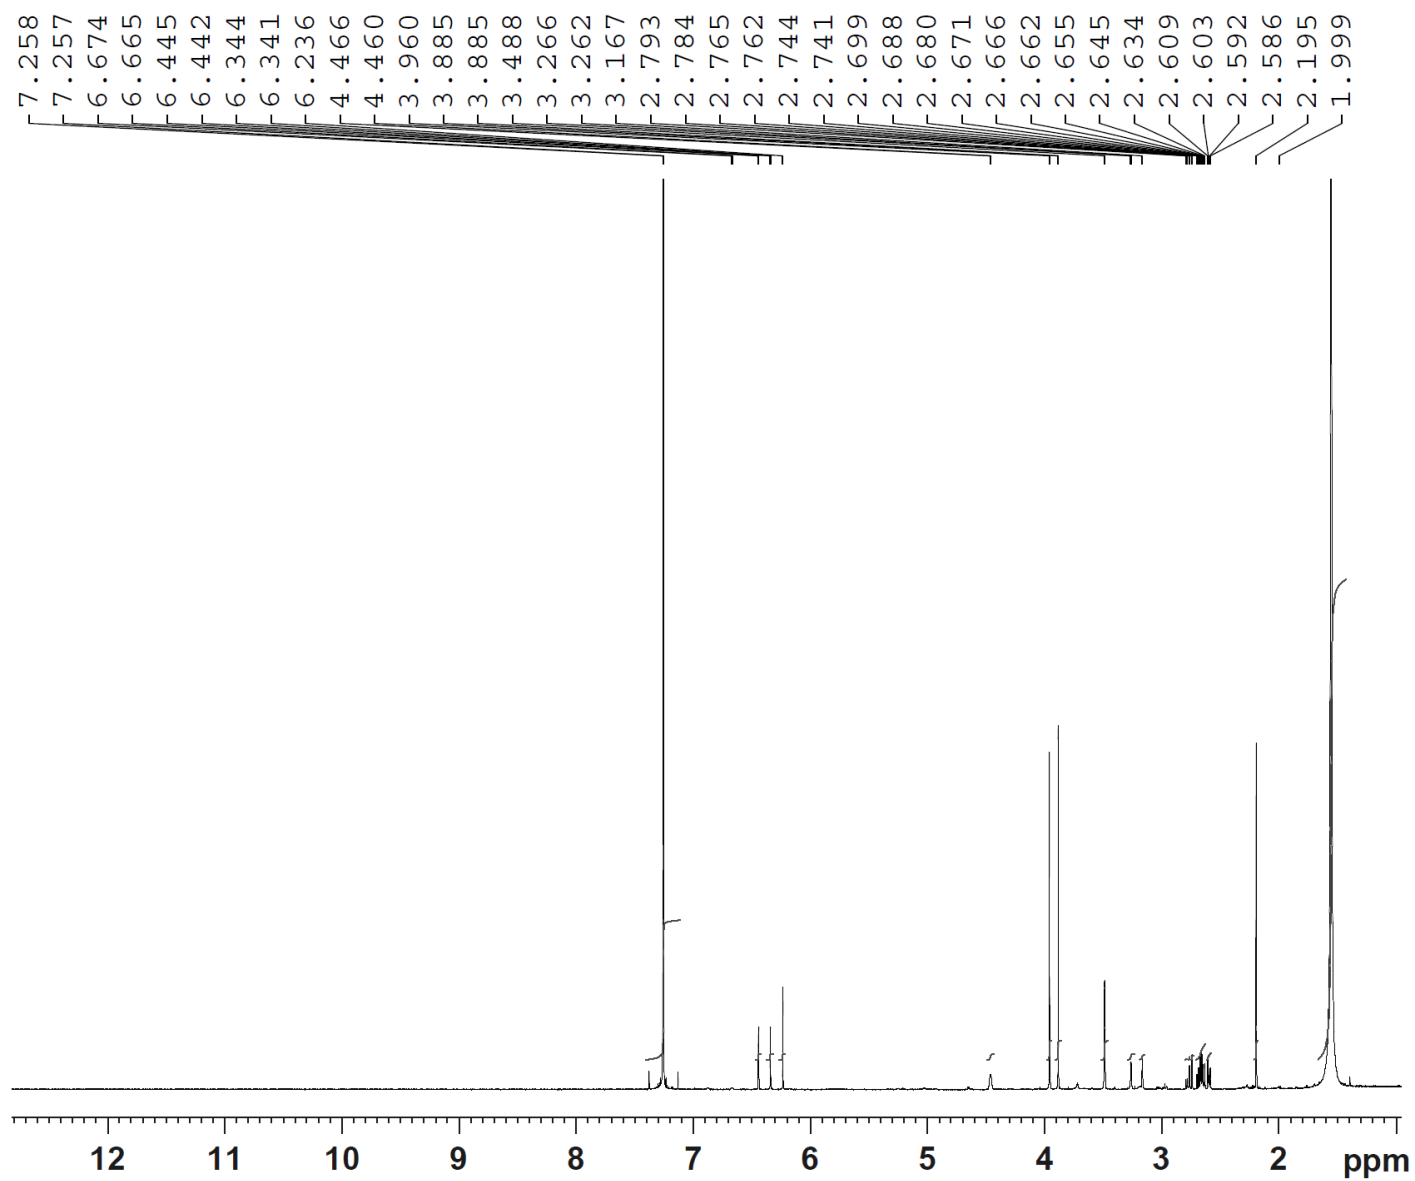

**Figure S22.** 600 MHz  $^1\text{H}$  NMR spectrum of (-)-6,8-di-*O*-methylnitroisocoumarin (**4**) ( $\text{CDCl}_3$ ) (Cont.).

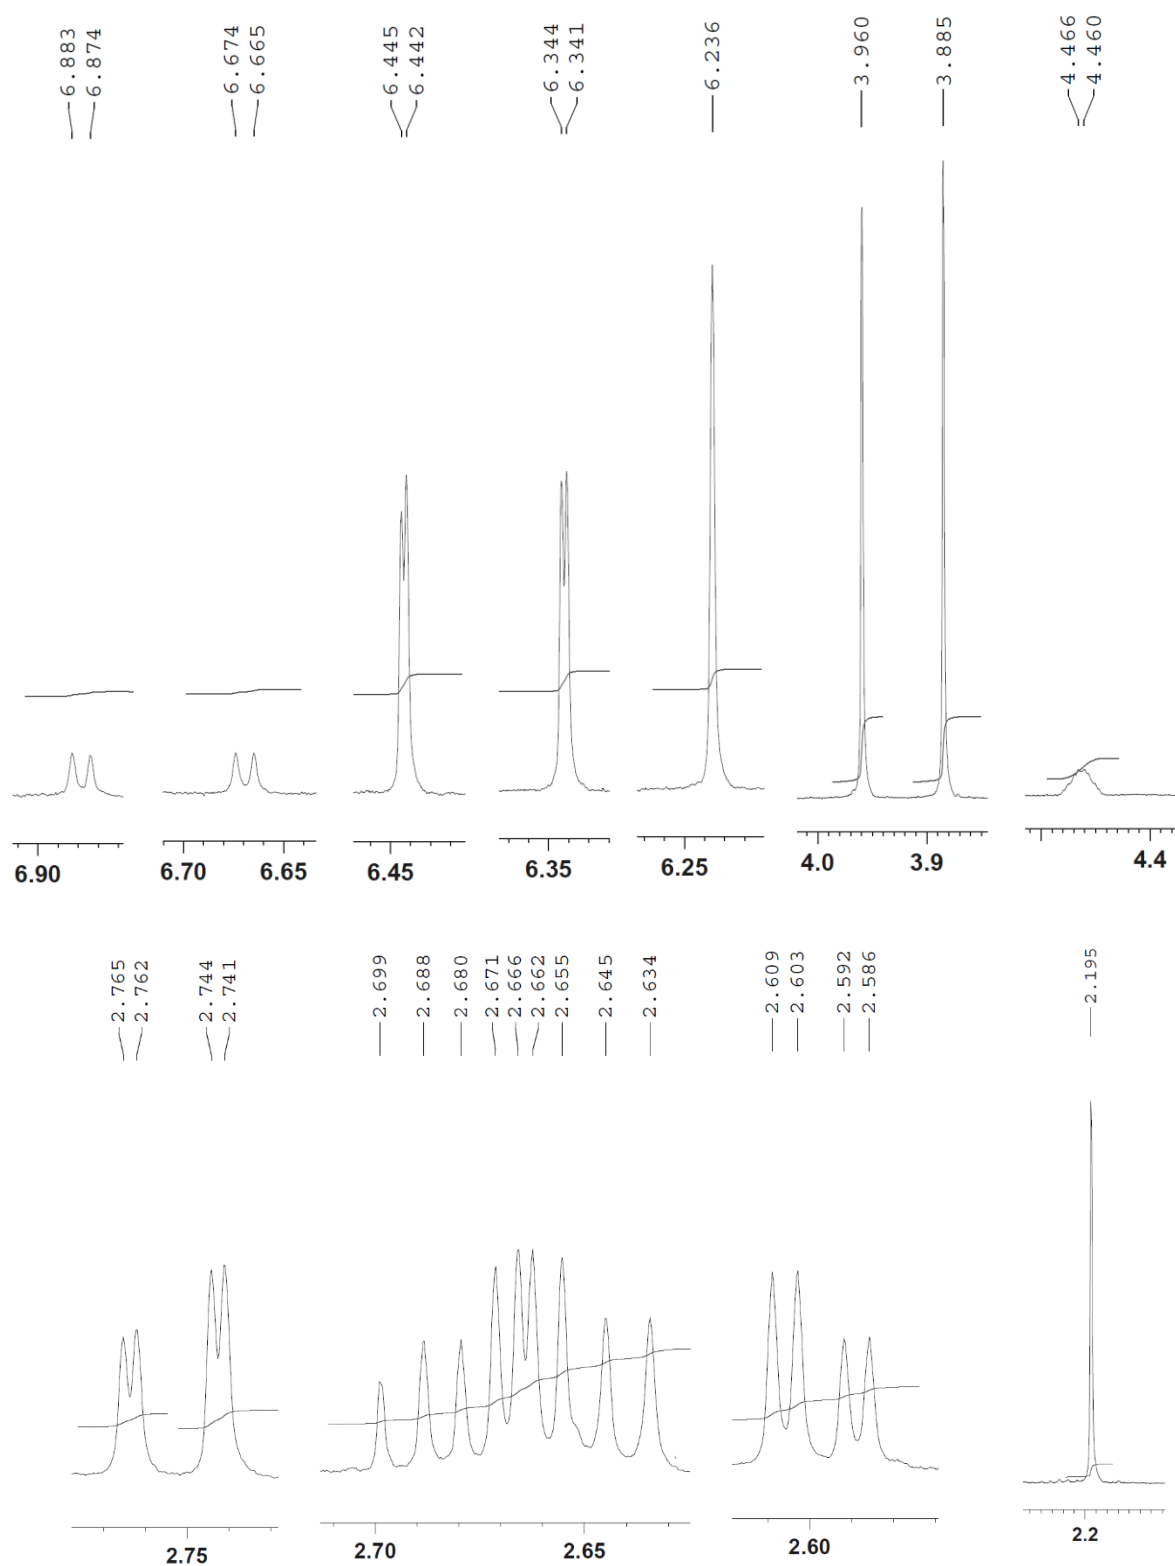

**Figure S23.** 150 MHz  $^{13}\text{C}$  NMR spectrum of (–)-6,8-di-*O*-methylnitreoisocoumarin (**4**) ( $\text{CDCl}_3$ ).

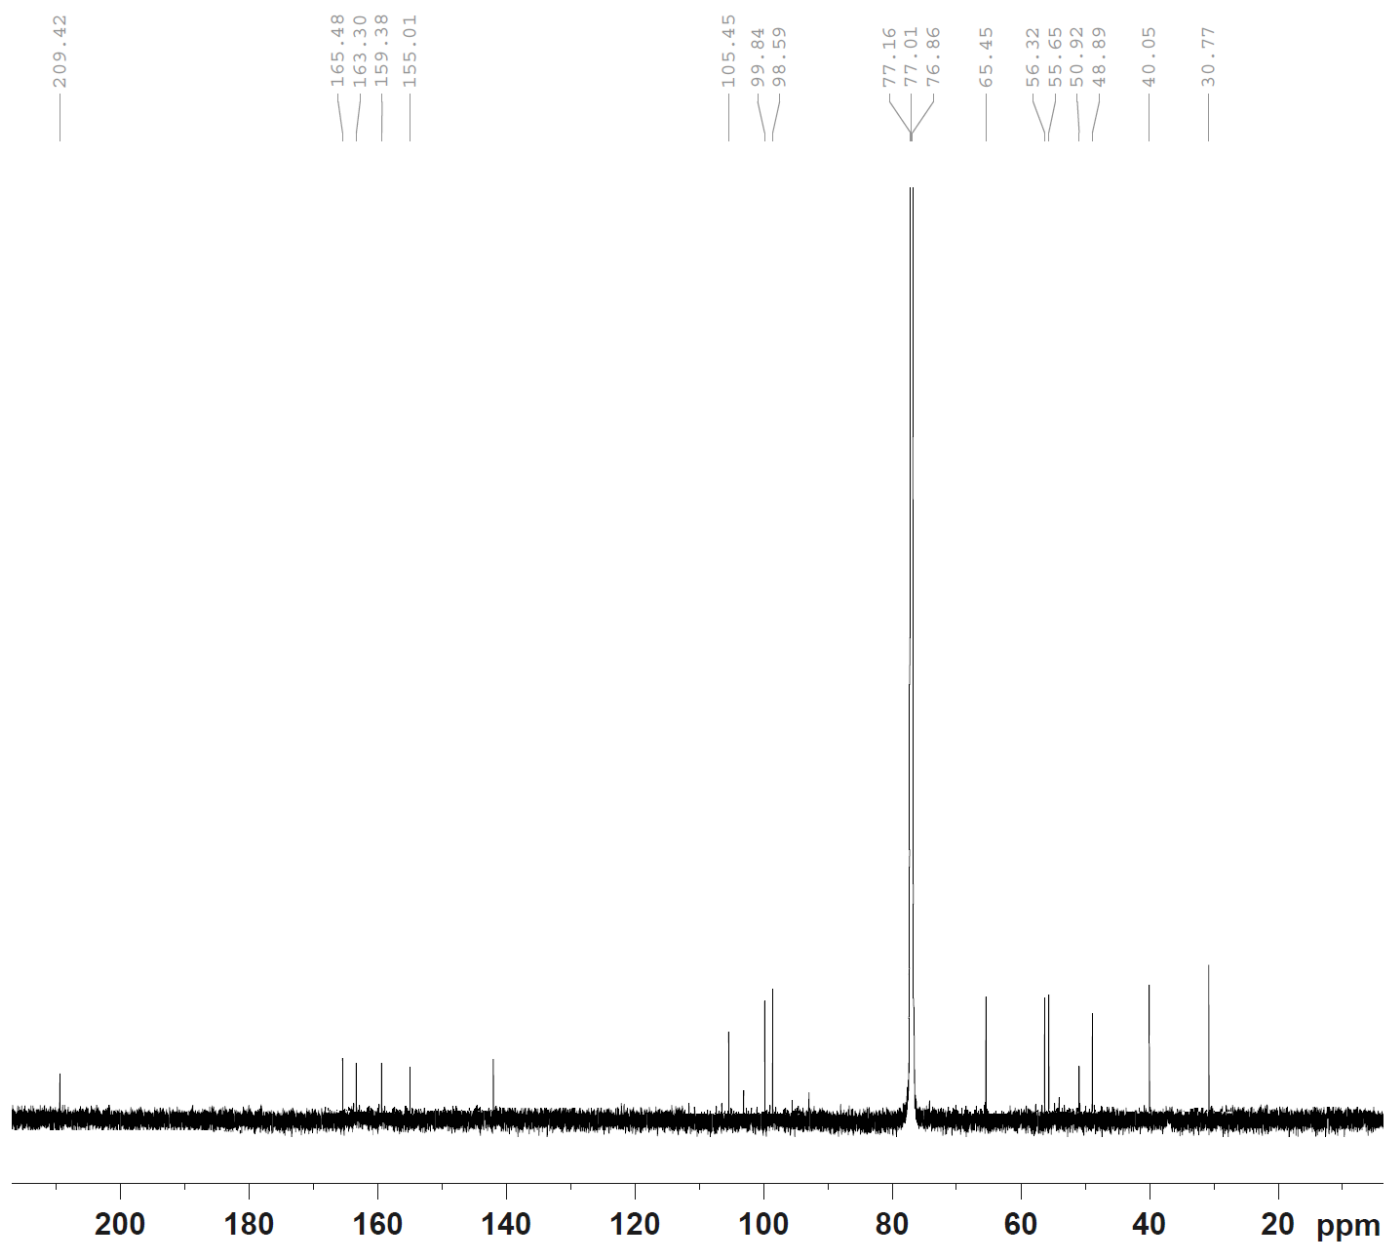

**Figure S24.** COSY spectrum of (-)-6,8-di-*O*-methylecitreoisocoumarin (**4**) (CDCl<sub>3</sub>).

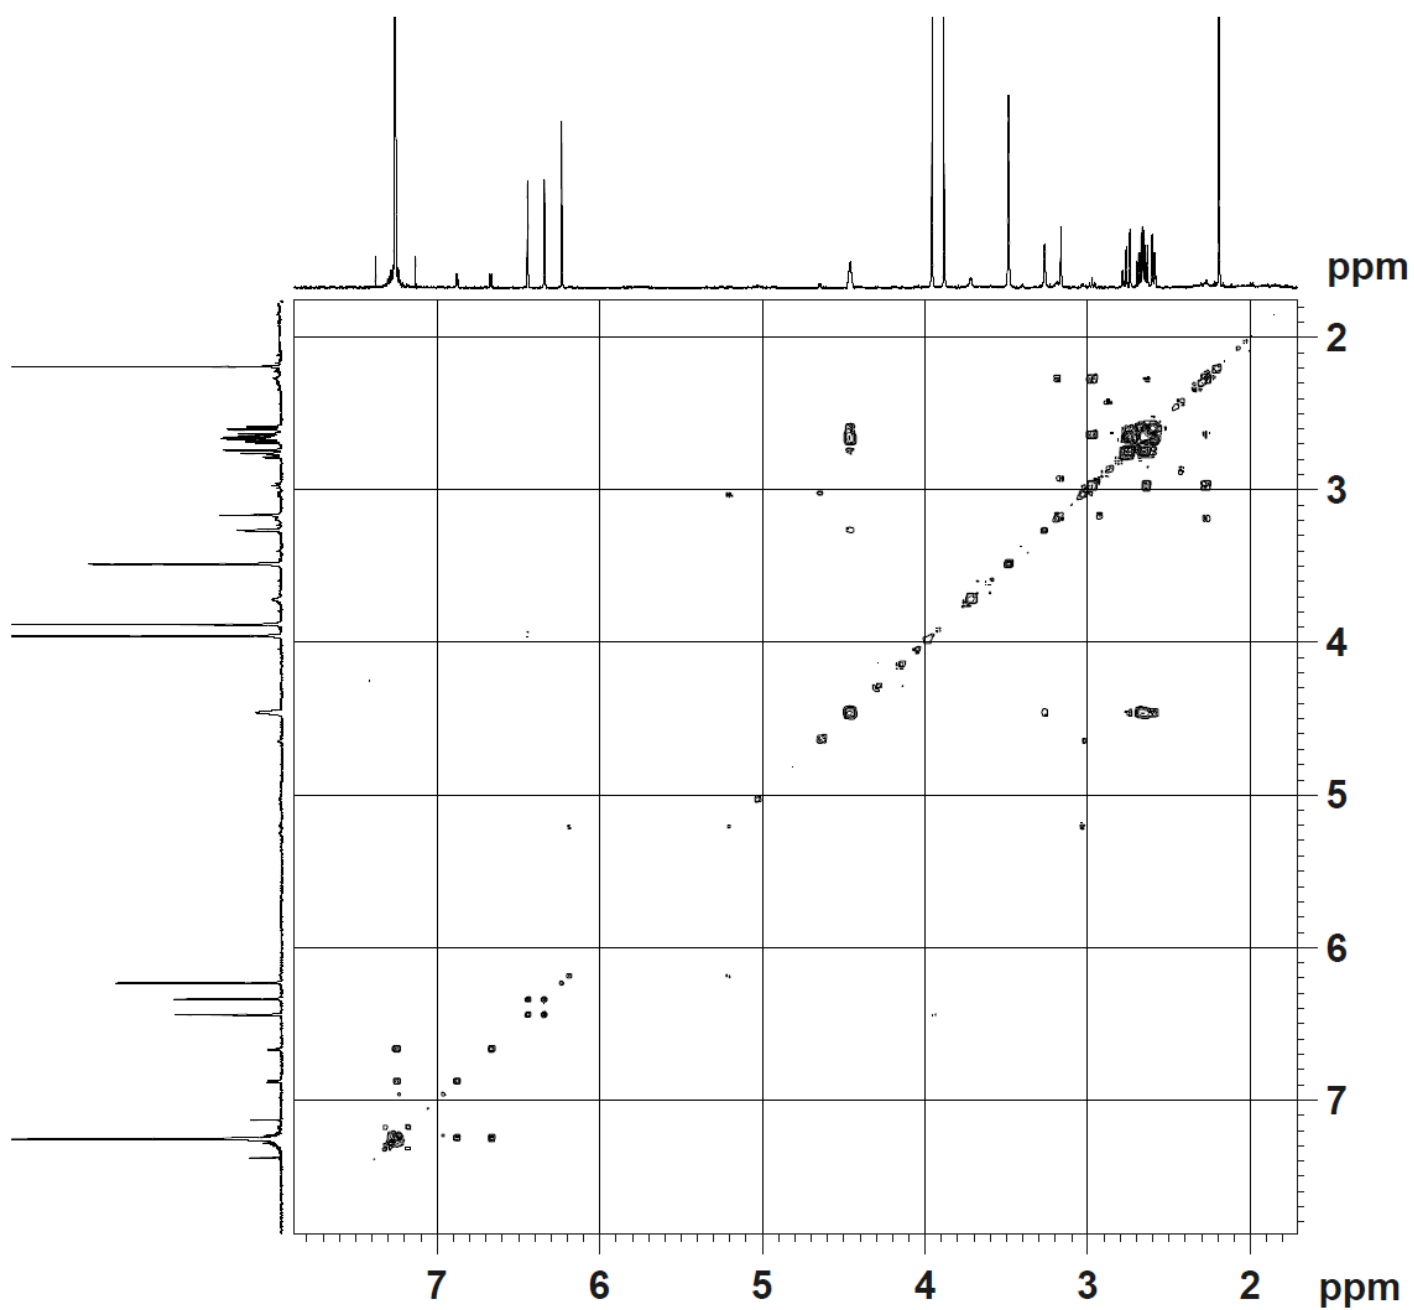

Figure S25. HSQC spectrum of (-)-6,8-di-*O*-methylocitreoisocoumarin (**4**) (CDCl<sub>3</sub>).

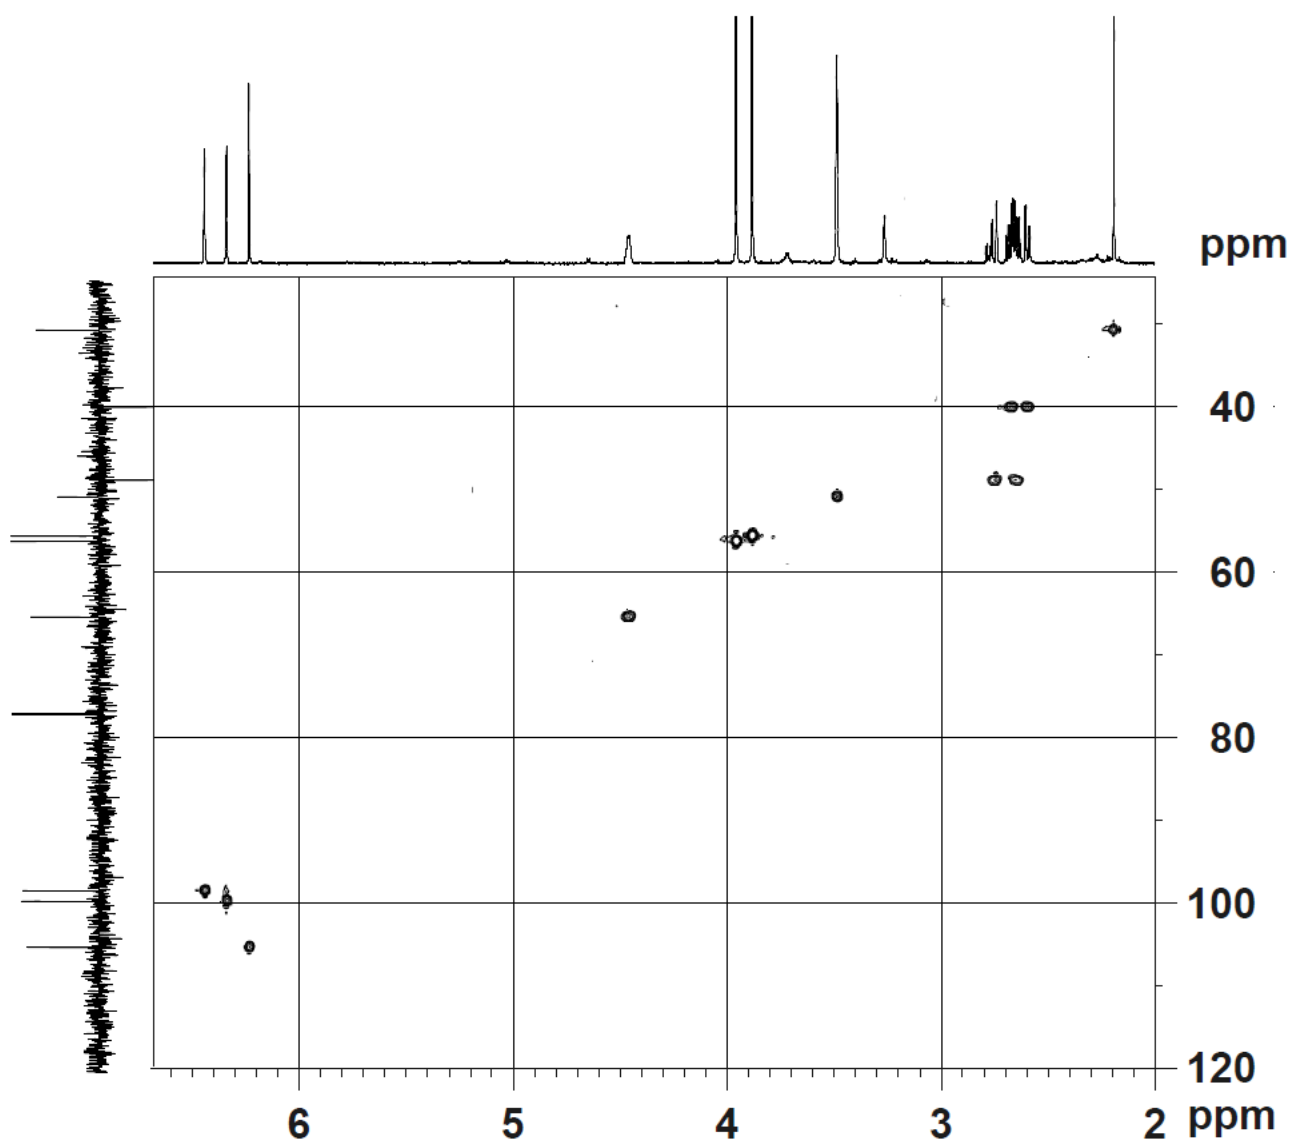

Figure S26. HMBC spectrum of (-)-6,8-di-*O*-methylcitreisocoumarin (**4**) (CDCl<sub>3</sub>).

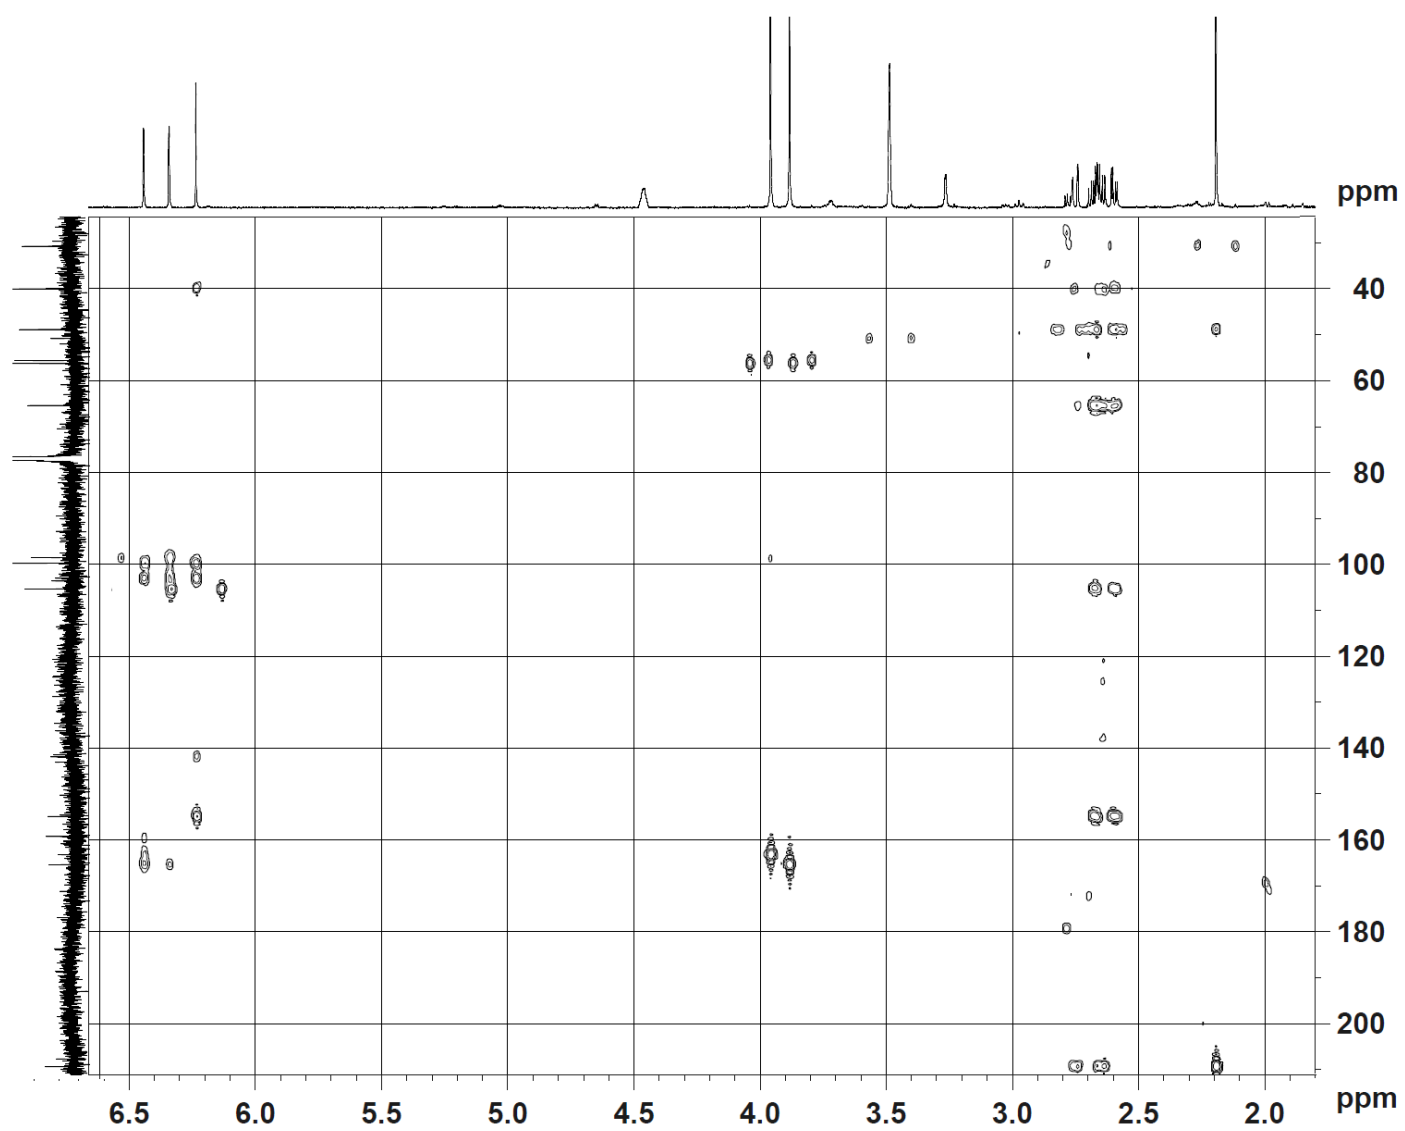

**Figure 27.** HPLC chromatograms of L-FDLA derivatized standard amino acid and the hydrolysates of compounds **1** and **2**.

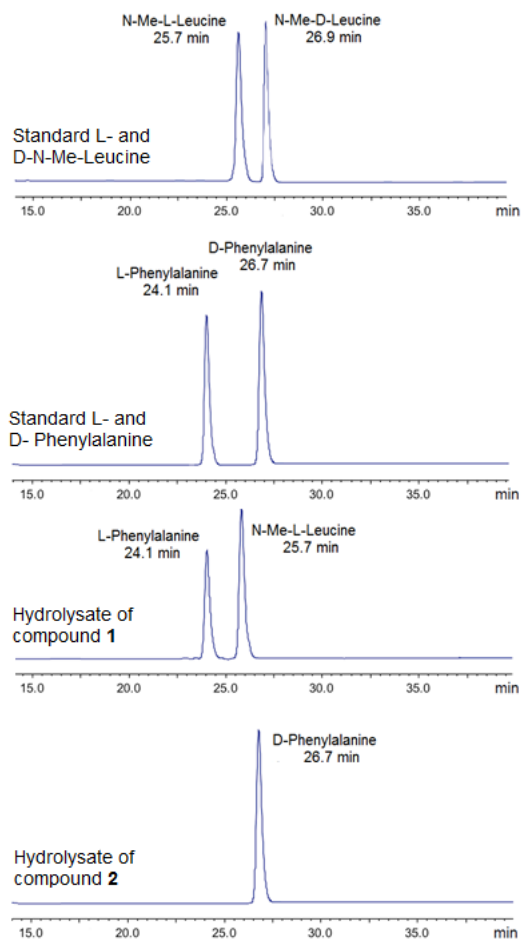

Supplement: s1 [file s1]
